# Supplementary material for: RNA-binding proteins of KHDRBS and IGF2BP families control the oncogenic activity of MLL-AF4
Source: PubMed Central journal article supplement (PMC9637093; doi:10.1038/s41467-022-34558-1), 2022-11-05
Supplement: 41467_2022_34558_MOESM1_ESM.pdf [file 41467_2022_34558_MOESM1_ESM.pdf]

RNA-Binding Proteins of KHDRBS and IGF2BP families control  
the Oncogenic Activity of MLL-AF4

Okuda *et al.*

SUPPLEMENTARY INFORMATION

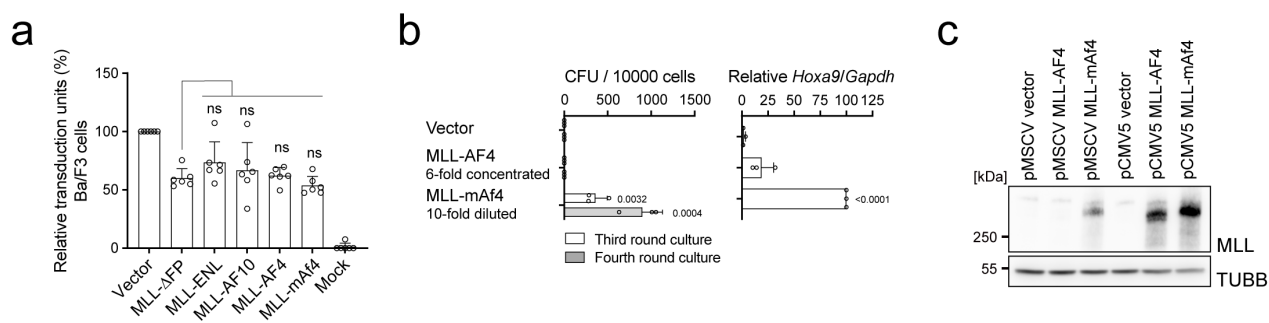

**Supplementary Fig. 1. Virus production from the constructs of *MLL* fusion genes. Related to Fig. 1.**

(a) Transduction of recombinant viruses into a murine pro-B cell line. Relative transduction units of retroviruses carrying various *MLL* fusion genes in murine Ba/F3 cells were determined using qPCR of the genomic DNA, as shown in Fig. 1f (n=6).

(b) Transforming ability of MLL-AF4 with an excess virus titer. Transforming ability using a 6-fold concentrated pool of MLL-AF4 was examined using the myeloid progenitor transformation assay, as shown in Fig. 1a, along with a 10-fold diluted pool of the MLL-mAf4 virus (n=3).

(c) Protein expression of MLL-AF4 and MLL-mAf4 driven by various promoters. Western blot analysis was performed on the whole cell lysates of 293T cells transfected with the expression vectors by which *MLL* fusions are transcribed from the LTR (pMSCV) or pCMV promoters (pCMV5).

Data are presented as the mean  $\pm$  SD of indicated biologically independent replicates (a, b). P-value was calculated by one-way ANOVA followed by Tukey's test (a, b). Source data are provided as a Source Data file.

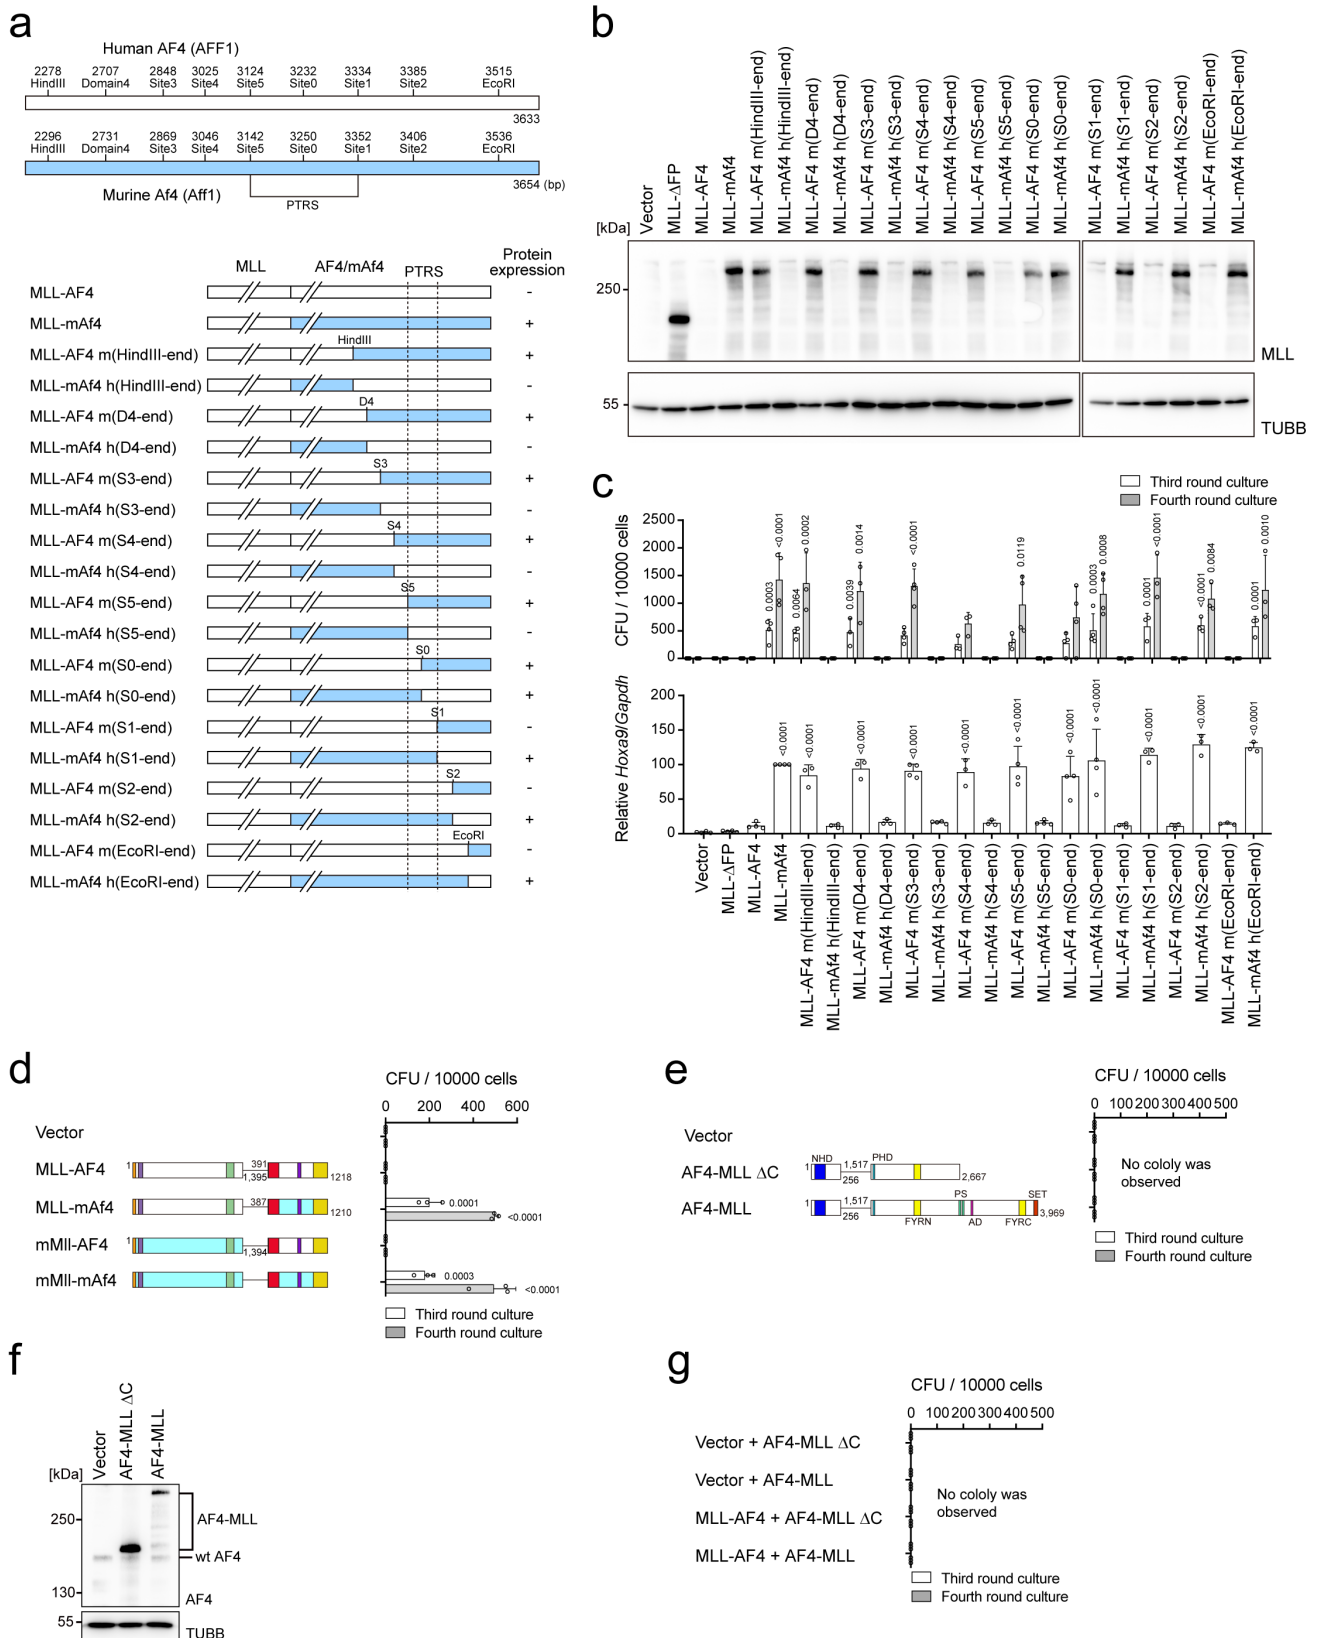

**Supplementary Fig. 2. Post-transcriptional regulatory sequence affects AF4 protein expression.**

**Related to Fig. 2.**

(a) Schematic representation of various domain-swapping mutants of MLL-AF4 and MLL-mAf4. Domain swapping mutants are shown in blue (mouse) and white (human). The positions in the coding

sequences are indicated on top.

(b) Protein expression of the domain-swapping mutants of MLL-AF4 and MLL-mAf4. Western blot analysis was performed on the whole cell lysates of 293T cells transfected with the MLL fusion expression vectors, as shown in Fig. 1d.

(c) Transforming ability of the domain-swapping mutants of MLL-AF4 and MLL-mAf4. The MLL fusion constructs shown in Supplementary Fig. 1A were examined for transformation of HSPCs under an ex vivo myeloid culture condition, as shown in Fig. 1a (n=4: Vector, MLL-ΔFP, MLL-AF4, MLL-mAf4, MLL-AF4 m(S3-end), MLL-mAf4 h(S3-end), MLL-AF4 m(S5-end), MLL-mAf4 h(S5-end), MLL-AF4 m(S3-end), MLL-mAf4 h(S3-end)); n=3: the others).

(d) Transforming ability of the domain-swapping mutants of murine/human MLL and murine/human AF4. Ex vivo myeloid progenitor transformation assays were performed as shown in Fig. 1a (n=3).

(e) Transforming ability of AF4-MLL. Ex vivo myeloid progenitor transformation assays were performed as shown in Fig. 1a (n=3).

(f) Protein expression of AF4-MLL. Western blot analysis was performed on the whole cell lysates of 293T cells transfected with AF4-MLL expression vectors, as shown in Fig. 1d.

(g) Transforming ability of MLL-AF4 in the presence of AF4-MLL. Two viruses were doubly transduced to HSPCs and their colony forming abilities were monitored as shown in Fig. 1a (n=2).

Data are presented as the mean ± SD of indicated biologically independent replicates (c, d, e, g). P-value was calculated by one-way ANOVA followed by Tukey's test (c, d). Source data are provided as a Source Data file.

**a**

| MLL-mAf4 | Name  | Day of sacrifice | CD3e | B220 | CD11b | Spleen (g) |
|----------|-------|------------------|------|------|-------|------------|
| 1        |       | 200              | (-)  | (-)  | (+)   | N.D.       |
| 2        |       | 239              | (-)  | (-)  | (+)   | 0.3285     |
| 3        | AML#1 | 159              | (-)  | (-)  | (+)   | 0.5531     |
| 4        |       | 189              | (-)  | (-)  | (+)   | 0.4235     |
| 5        |       | 132              | (-)  | (-)  | (+)   | 0.3900     |
| 6        | AML#2 | 132              | (-)  | (-)  | (+)   | 0.6207     |
| 7        |       | 154              | (-)  | (-)  | (+)   | 0.5070     |
| 8        |       | 154              | (-)  | (-)  | (+)   | 0.8219     |
| 9        |       | 119              | (-)  | (-)  | (+)   | 0.4207     |
| 10       | AML#3 | 141              | (-)  | (-)  | (+)   | 0.5083     |
| 11       |       | 202              | (-)  | (-)  | (+)   | 0.5645     |

  

| MLL-AF4 sPTRS | Name  | Day of sacrifice | CD3e | B220 | CD11b | Spleen (g) |
|---------------|-------|------------------|------|------|-------|------------|
| 1             | AML#1 | 145              | (-)  | (-)  | (+)   | 0.5137     |

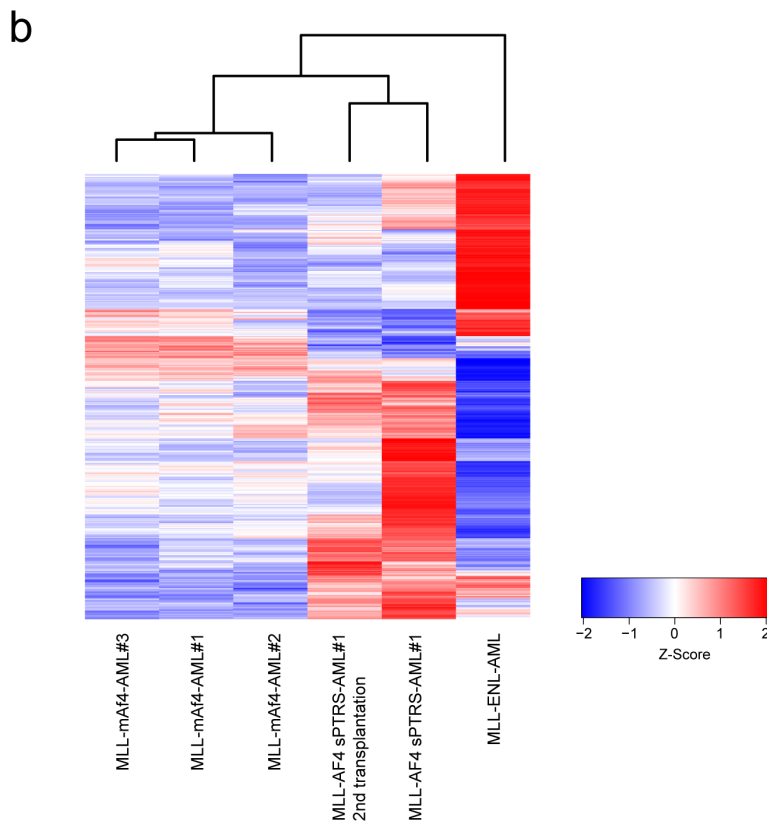

**Supplementary Fig. 3. Immunophenotypes of leukemia induced by MLL-AF4 sPTRS. Related to Fig. 3.**

(a) Surface marker expression of bone marrow cells from leukemic mice. Latency, antigen expression, and the weight of spleen of all leukemia cases are shown.

(b) Expression profiles of bone marrow cells harvested from MLL-AF4, MLL-mAf4 and MLL-ENL leukemic mice. Hierarchical clustering was performed by heatmap.2 function in r environment.

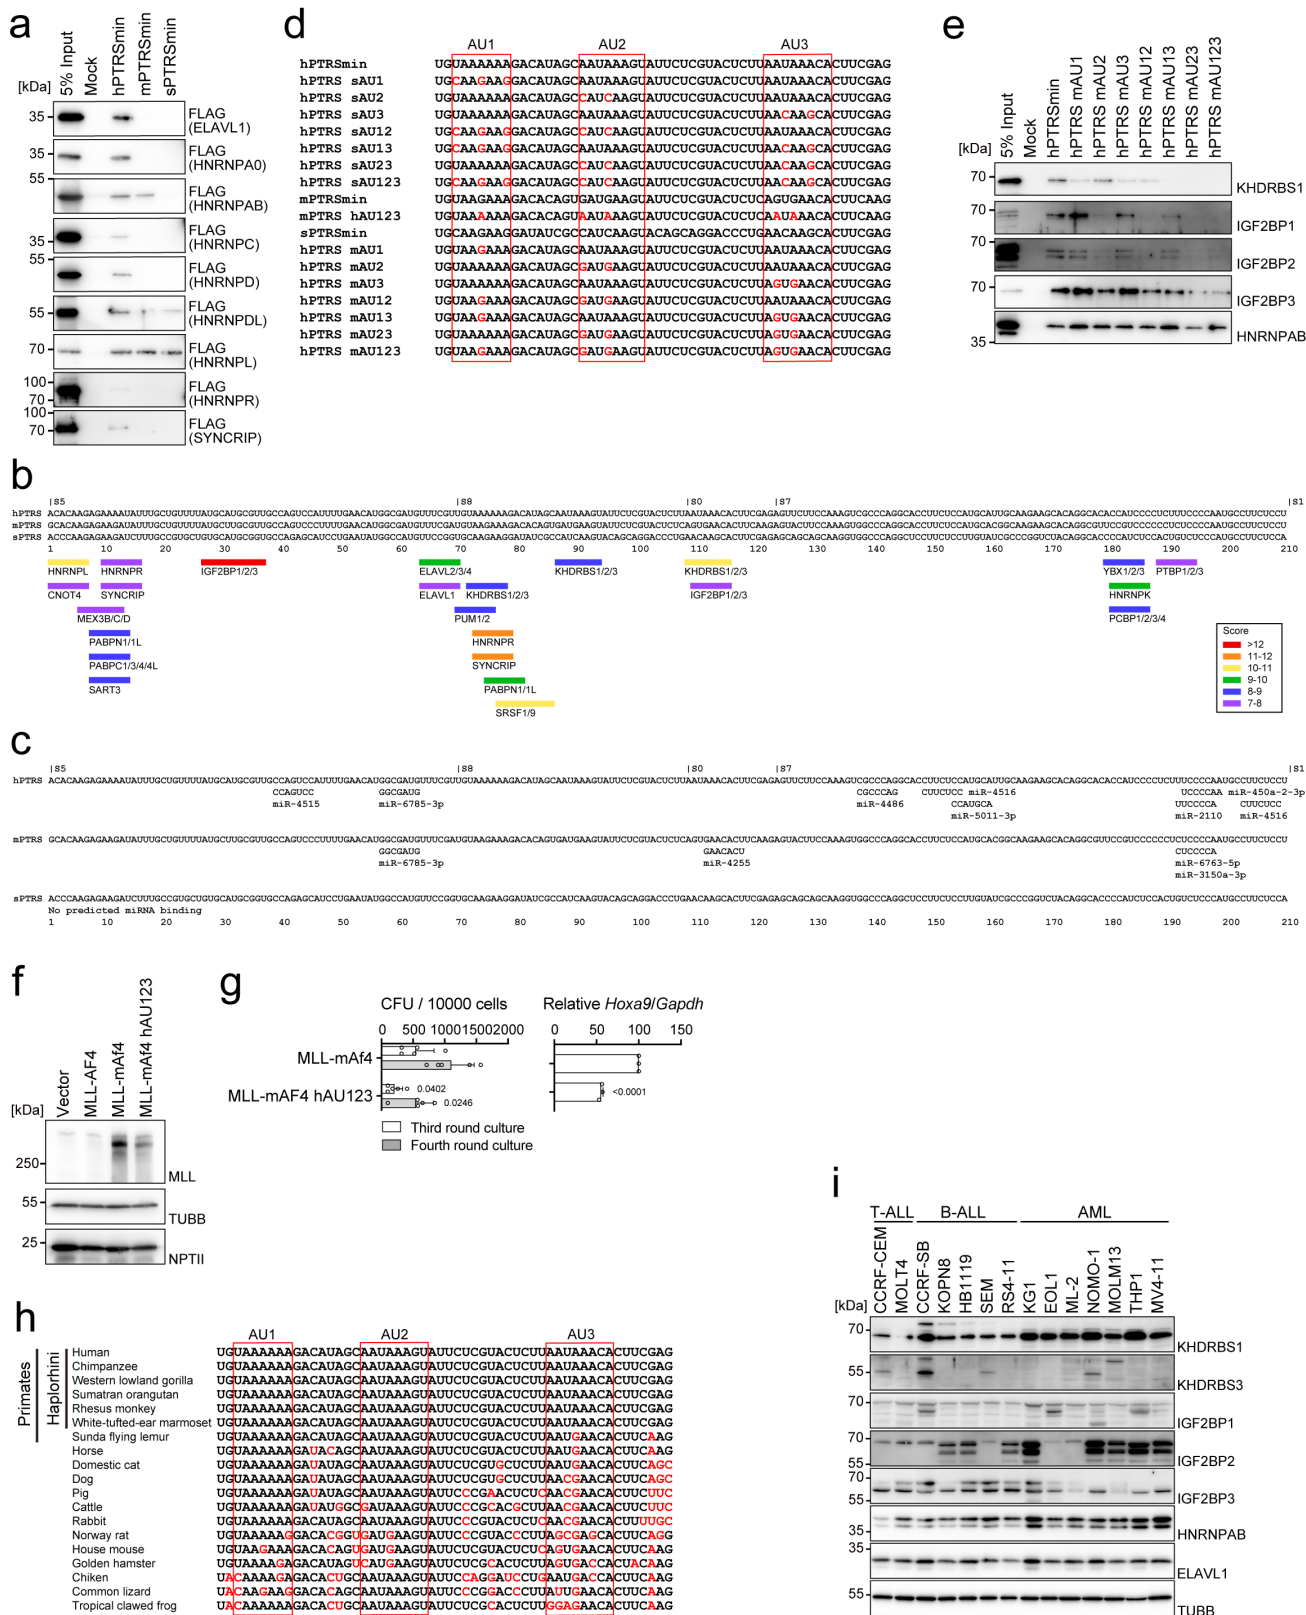

**Supplementary Fig. 4. Three AU-rich sequences were the scaffold for association of various RBPs. Related to Fig. 4.**

(a) Association of various RBPs with the PTRS. Immunoprecipitation-western blot analysis using the PTRS RNAs was performed on the lysates of 293T cells transiently expressing FLAG-tagged proteins

as shown in Fig. 4c.

(b) The RNA sites specifically recognized by various RBPs in the PTRS of human *AF4*. A result of CISBP-RNA database analysis is shown as in Fig. 4d for a broader region of the PTRS.

€ Predicted miRNA and lncRNA binding sites on the PTRSs. Results of miRbase and lncRNAdb database analyses are shown.

(d) Sequence of the mutated PTRSs. Mutations introduced in each mutant are highlighted in red.

(e) Association of endogenous RBPs to the PTRS of human *AF4* partially replaced by mouse sequences. Immunoprecipitation-western blot analysis using the PTRS RNAs shown in Fig. S4C was performed on the lysates of 293T cells, as shown in Fig. 4g. AU-rich sites of human PTRS were replaced by the corresponding mouse sequence.

(f) Protein expression of the MLL-mAF4 mutant with human AU-rich motifs in 293T cells. Protein level of the MLL-mAf4 mutant was analyzed as mentioned in Fig. 1d.

(g) Transforming ability of the MLL-mAf4 mutant, the AU-rich sites of which were replaced by human sequences. An MLL-mAf4 construct carrying human AU-rich sites was examined for transformation of HSPCs under ex vivo myeloid culture conditions, as shown in Fig. 1a (n=5). *Hoxa9* expression normalized to *Gapdh* is shown as the relative value of MLL-mAF4 (set to 100) (n=3). Data are presented as the mean  $\pm$  SD of indicated biologically independent replicates. P-value was calculated by two tailed T-test.

(h) Sequence alignment of the PTRS of various organisms. AU-rich sites are highlighted by red rectangles. Bases different from human AU-rich sites are shown in red letters.

(i) Expression of RNA-binding proteins in various leukemia cell lines. Western blotting of RBPs was performed using whole cell lysates of leukemia cell lines of various lineages.

Source data are provided as a Source Data file.

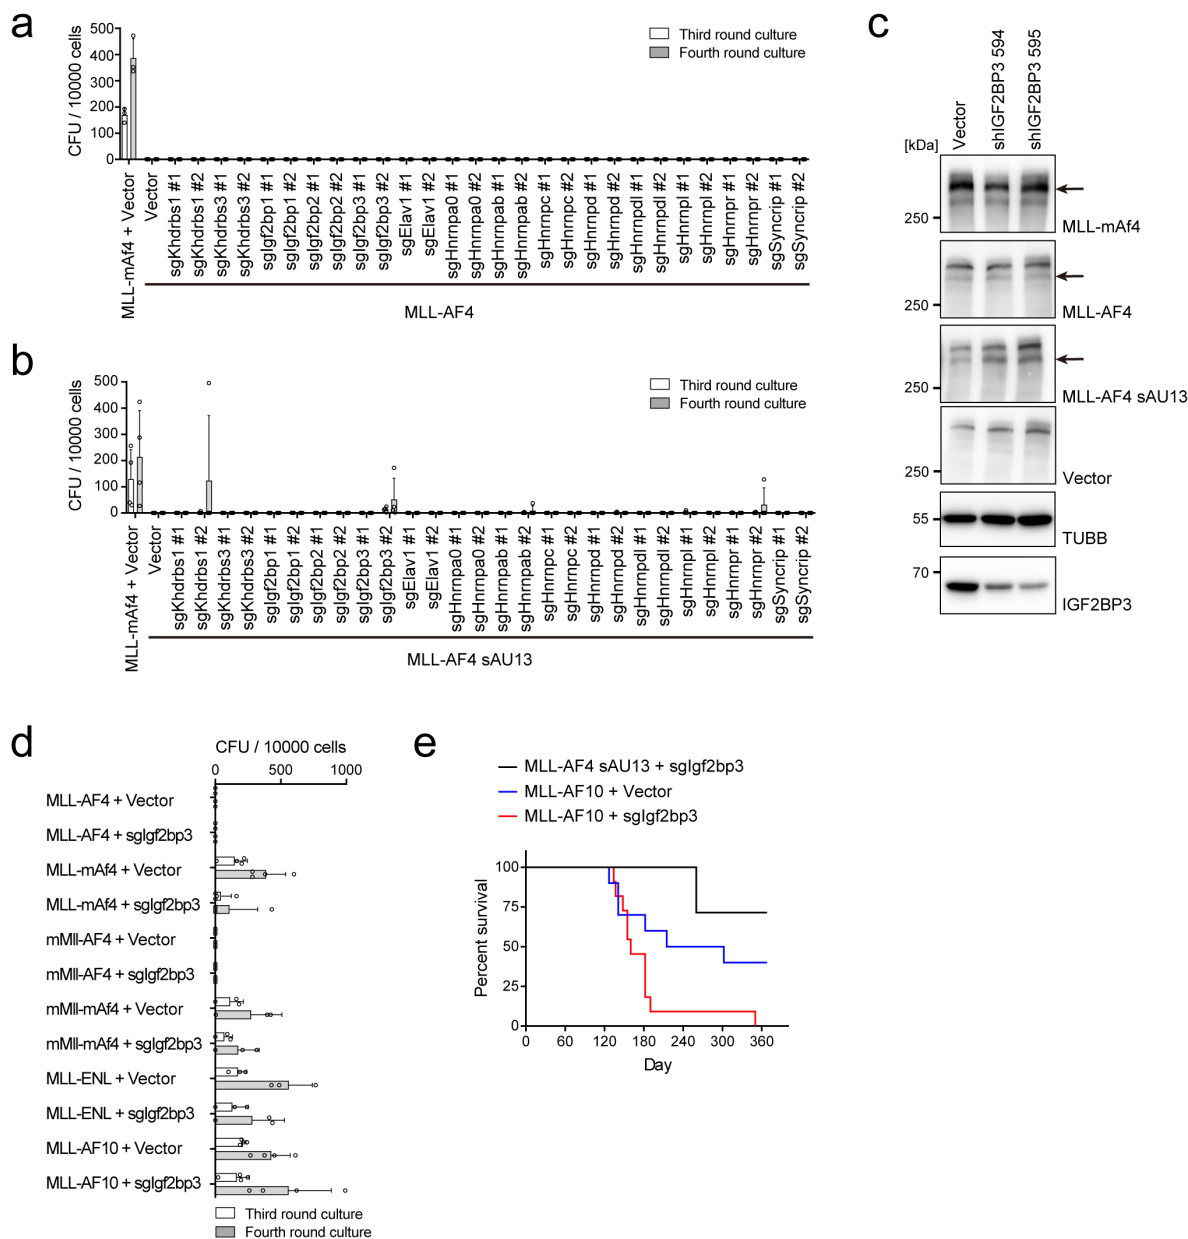

**Supplementary Fig. 5. sgRNA screening of the transformation capabilities of the MLL-AF4 sAU13 mutant and protein expression of the mutant after depletion of IGF2BP3.**

(a) Screening of RBPs responsible for post-transcriptional inactivation of MLL-AF4. The MLL-AF4 construct was examined for transformation of HSPCs under an ex vivo myeloid culture condition with co-transduction of various knockout constructs for RBPs, as shown in Fig. 5a (n=3).

(b) Screening of RBPs responsible for post-transcriptional inactivation of MLL-AF4 sAU13. The MLL-AF4 construct carrying synonymous mutations at AU1 and 3 was examined for transformation of HSPCs under an ex vivo myeloid culture condition with co-transduction of various knockout constructs for RBPs, as shown in Fig. 5a. Data are shown as the mean  $\pm$  SD of three biological replicates (a, b) (n=3: MLL-AF4 sAU13 + sgHnrnpa0#1, MLL-AF4 sAU13 + sgHnrnpa0#2, MLL-AF4 sAU13 + sgHnrnpc#1, MLL-AF4 sAU13 + sgHnrnpc#2, MLL-AF4 sAU13 + sgHnrnpd#1,



MLL-AF4 sAU13 + sgHnrnp1#2, MLL-AF4 sAU13 + sgHnrnp1#1, MLL-AF4 sAU13 + sgHnrnp1#2, MLL-AF4 sAU13 + sgSyncrip#1, MLL-AF4 sAU13 + sgSyncrip#2; n=4: the others).

(c) Effects of knocking down *IGF2BP3* on protein expression of MLL-AF4. 293T cells were transduced with two different sh-RNA constructs for *IGF2BP3* and subsequently transfected with various MLL-AF4 expression vectors. Western blot analysis was performed on the whole cell lysate of transfected cells using anti-MLL antibody. Western blot analysis of TUBB and IGF2BP3 was also performed.

(d) Effects of *Igf2bp3* knockout on various MLL fusion mediated transformation. MLL fusion constructs were doubly transduced with the CRISPR/Cas9 knockout construct for *Igf2bp3* into murine HSPCs and examined for their transforming abilities under ex vivo myeloid culture conditions, as shown in Fig. 5a (n=4: MLL-mAf4 + Vector, MLL-mAf4 + sgIgf2bp3, MLL-AF10 + Vector, MLL-AF10 + sgIgf2bp3; n=3: mMll-AF4 + Vector, mMll-AF4 + sgIgf2bp3, mMll-mAf4 + Vector, mMll-mAf4 + sgIgf2bp3, MLL-ENL + Vector, MLL-ENL + sgIgf2bp3; n=2: MLL-AF4 + Vector, MLL-AF4 + sgIgf2bp3).

(e) Leukemogenic potential of MLL fusion-immortalized cells with or without *Igf2bp3* knockout in vivo. MLL-AF10-immortalized cells with or without *Igf2bp3* knockout and MLL-AF4 sAU13/*Igf2bp3* knockout-immortalized cells established in Fig. 5a were transplanted into syngeneic mice. (MLL-AF4 sAU13 sgIgf2bp3, n = 7; MLL-AF10 vector, n = 10; MLL-AF10 sgIgf2bp3, n = 11). As for the transplantation experiment of MLL-AF4 sAU13/*Igf2bp3* knockout-immortalized cells, two recipient mice died of unknown causes. Three recipient mice became sick with B-ALL, but the transgene expression was not detected by RT-PCR, therefore excluded as spontaneous leukemia cases. p-value (p=0.0377) was calculated by log-rank test (MLL-AF10 vector vs. MLL-AF10 sgIgf2bp3). Data are presented as the mean  $\pm$  SD of indicated biologically independent replicates (a, b, d). Source data are provided as a Source Data file.

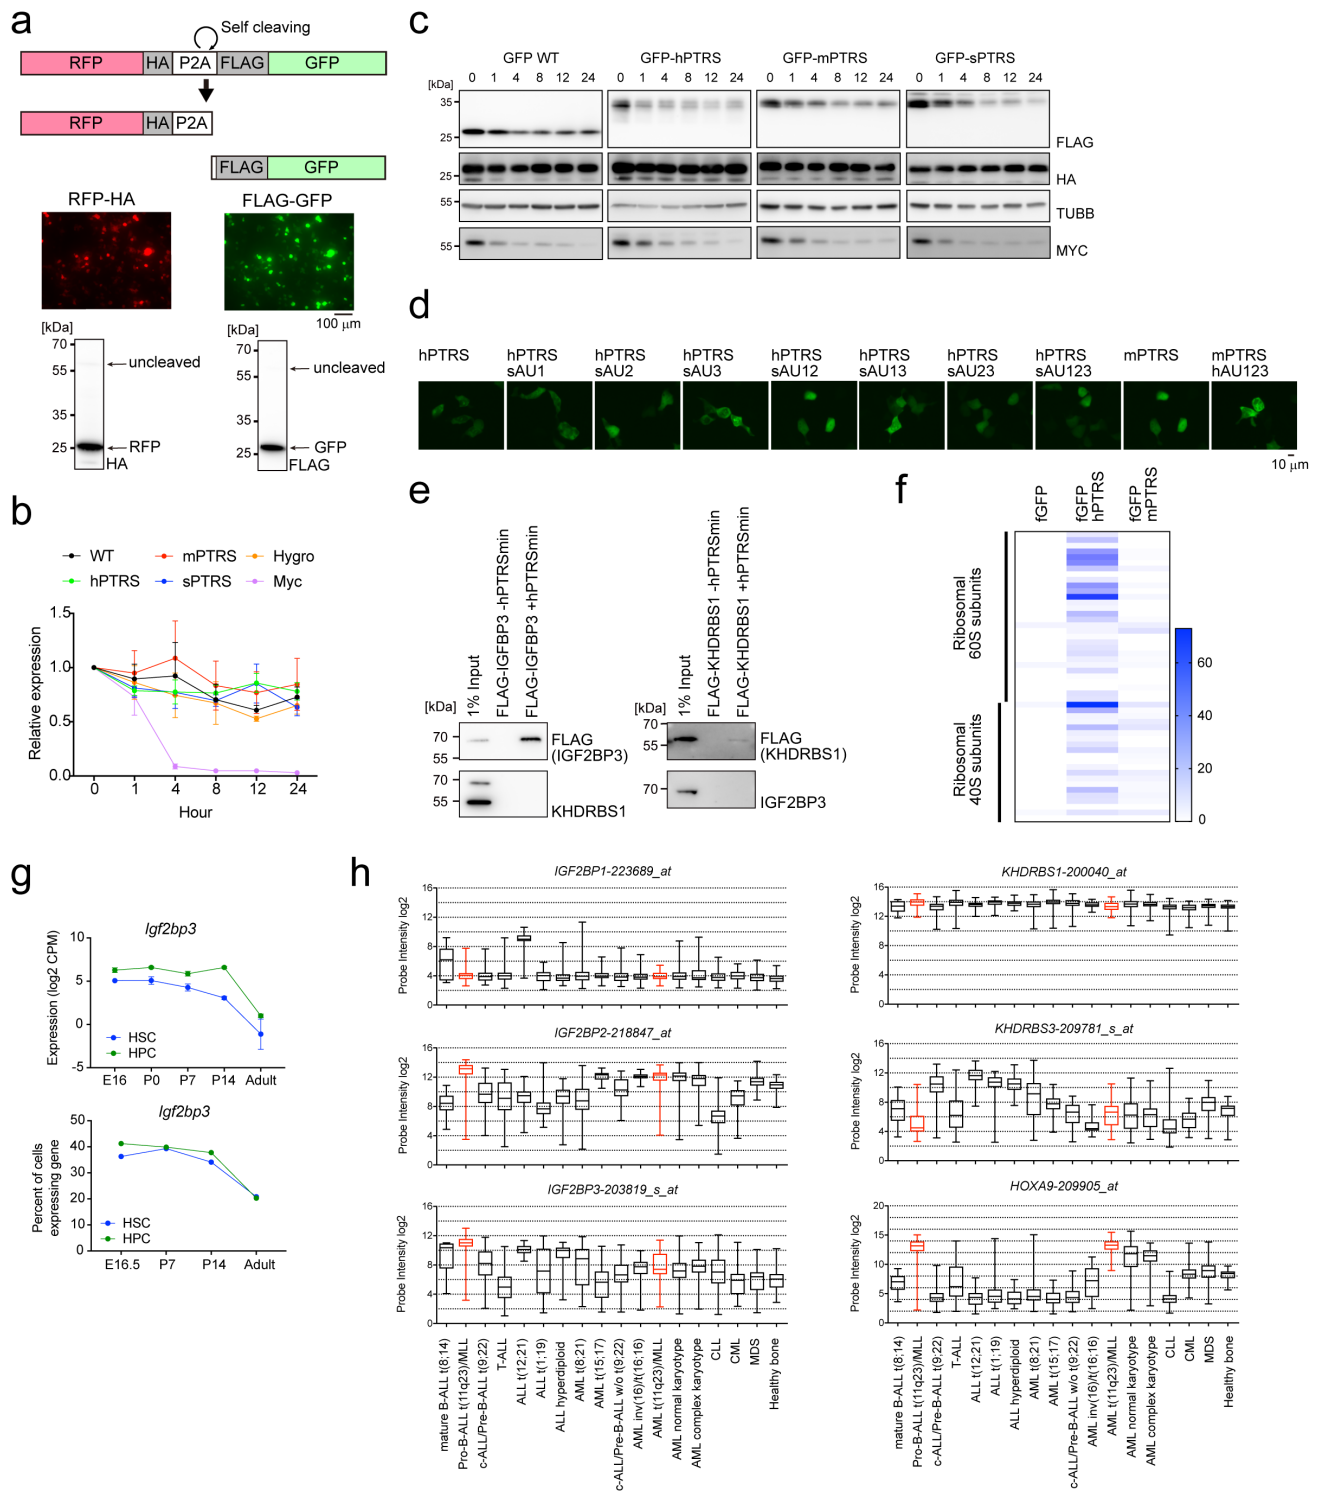

**Supplementary Fig. 6. Fluorescent reporter recapitulated post-transcriptional regulation of MLL-AF4 expression. Related to Fig. 6.**

(a) Schematic representation of the self-cleaving GFP/RFP reporter system. Cleaving efficiency of the P2A sequence of the fluorescent reporter. 293T cells transfected with the reporter plasmid were analyzed using fluorescence microscopy and western blotting.

(b) mRNA stability of the reporter genes. The reporter plasmids were transfected into 293T cells and treated with actinomycin D for 24 h. The mRNAs were purified and quantified by RT-qPCR. The

expression level was normalized by that of GAPDH. MYC gene was used as a positive control. Data are shown as the mean  $\pm$  SD of three biological replicates.

(c) Protein stability of the reporter proteins. The reporter plasmids were transfected into 293T cells and treated with cycloheximide for 24 h. The protein levels were visualized by western blotting. MYC protein was used as a positive control.

(d) Subcellular localization of fluorescence signals of various GFP-tagged PTRS reporters.

(e) Non-simultaneous binding of RBPs to hPTRS. Two-step IP analysis of IGF2BP3 and KHDRBS1 on the hPTRS RNA oligonucleotide was performed. The FLAG-tagged RBPs were transfected into 293T cells. Then the lysate was mixed with the hPTRS RNA oligonucleotide and subjected to subsequent pull down of FLAG-tagged proteins and the bait RNAs.

(f) Associated factors for the GFP-PTRS reporter proteins. Heatmap representation of the scores of the ribosomal proteins associated with PTRS reporters.

(g) scRNA-seq data of the murine embryonic HSPCs in the public database. The expression levels and percentages of the cells expressing *Igf2bp3* during developmental stages were plotted. CPM: count per million, HSC: hematopoietic stem cell, HPC: hematopoietic progenitor cell. (Li et al., 2020<sup>18</sup>, GSE128761)

(h) Expression of RBPs in the human leukemia specimens. The log<sub>2</sub> probe intensities in various subtypes of the leukemias were plotted (MILE stage 2<sup>19</sup>, GSE13164). Data are shown as the boxplot. The center line indicates the median value. The box limits indicate the first and third quartiles. The bar limits indicate the maximum and minimum values. (mature B-ALL t(8;14): n=13, Pro-B-ALL t(11q23)/MLL: n=70, c-ALL/Pre-B-ALL t(9;22): n=122, T-ALL: n=174, ALL t(12;21): n=58, ALL t(1;19): n=36, ALL hyperdiploid: n=40, c-ALL/Pre-B-ALL w/o t(9;22): n=237, AML t(8;21): n=40, AML t(15;17): n=37, AML inv(16)/t(16;16): n=28, AML t(11q23)/MLL: n=38, AML normal karyotype: n=351, AML complex karyotype: n=48, CLL: n=448, CML: n=76, MDS: 206, Healthy bone: n=74) ALL: acute lymphoblastic leukemia, AML: acute myeloid leukemia, CLL: chronic lymphocytic leukemia, CML: chronic myeloid leukemia, MDS: myelodysplastic syndromes.

Source data are provided as a Source Data file.

**Supplementary Table 1, Materials**

| REAGENT or RESOURCE                                   | SOURCE                       | IDENTIFIER                            |
|-------------------------------------------------------|------------------------------|---------------------------------------|
| Antibodies                                            |                              |                                       |
| Mouse monoclonal anti-FLAG M2                         | Sigma-Aldrich                | Cat#F3165<br>RRID: AB_259529          |
| Rabbit polyclonal anti-FLAG                           | Sigma-Aldrich                | Cat#F7425<br>RRID: AB_439687          |
| Rat monoclonal anti-HA (clone 3F10)                   | Roche                        | Cat#11867423001<br>RRID: AB_390919    |
| Rabbit monoclonal anti-MLL (clone D2M7U)              | Cell Signaling<br>Technology | Cat#14689<br>RRID:<br>AB_2688009      |
| Rabbit polyclonal anti-TUBB2C                         | Invitrogen                   | Cat#PA5-25050<br>RRID:<br>AB_2542550  |
| Rabbit polyclonal anti-neomycin phosphotransferase II | Merck-Millipore              | Cat#06-747<br>RRID: AB_310234         |
| Rabbit polyclonal anti-KHDRBS1                        | Bethyl Laboratories          | Cat#A302-110A<br>RRID:<br>AB_1604287  |
| Rabbit polyclonal anti-KHDRBS1                        | Bethyl Laboratories          | Cat#A302-111A<br>RRID:<br>AB_1604288  |
| Rabbit polyclonal anti-KHDRBS3                        | Bethyl Laboratories          | Cat#A303-192A<br>RRID:<br>AB_10951667 |
| Rabbit polyclonal anti-IGF2BP1                        | Bethyl Laboratories          | Cat#A303-423A<br>RRID:<br>AB_10954093 |
| Rabbit polyclonal anti-IGF2BP1                        | Bethyl Laboratories          | Cat#A303-424A<br>RRID:<br>AB_10951834 |

|                                                                     |                              |                                       |
|---------------------------------------------------------------------|------------------------------|---------------------------------------|
| Rabbit polyclonal anti-IGF2BP2                                      | Bethyl Laboratories          | Cat#A303-317A<br>RRID:<br>AB_10952227 |
| Rabbit polyclonal anti-IGF2BP3                                      | Bethyl Laboratories          | Cat#A303-425A<br>RRID:<br>AB_10953339 |
| Rabbit polyclonal anti-IGF2BP3                                      | Bethyl Laboratories          | Cat#A303-426A<br>RRID:<br>AB_10951696 |
| Mouse monoclonal anti-HNRNPAB (clone G10)                           | Santa Cruz<br>Biotechnology  | Cat#sc-376411<br>RRID:<br>AB_11150309 |
| Rabbit monoclonal anti-RPL5                                         | Cell Signaling<br>Technology | Cat#51345<br>RRID:<br>AB_2799391      |
| Rabbit polyclonal anti-RPL7a                                        | Cell Signaling<br>Technology | Cat#2415<br>RRID:<br>AB_2182059       |
| Rabbit polyclonal anti-RPL7                                         | Bethyl Laboratories          | Cat#A300-741A<br>RRID:<br>AB_2301241  |
| Rabbit polyclonal anti-RPS14                                        | Bethyl Laboratories          | Cat#A304-031A<br>RRID:<br>AB_2621280  |
| Rabbit polyclonal anti-AF4                                          | Bethyl Laboratories          | Cat#A302-344A<br>RRID:<br>AB_1850255  |
| Rabbit monoclonal anti-MYC                                          | Cell Signaling<br>Technology | Cat#13987<br>RRID:<br>AB_2631168      |
| Rat monoclonal anti-human/mouse CD45R(B220)<br>(clone RA3-6B2)-FITC | eBioscience                  | Cat#11-0452-82<br>RRID: AB_465054     |
| Rat monoclonal anti-human/mouse CD45R(B220)<br>(clone RA3-6B2)-PE   | BioLegend                    | Cat#103208<br>RRID: AB_312993         |

|                                                                     |                          |                                   |
|---------------------------------------------------------------------|--------------------------|-----------------------------------|
| Armenian hamster monoclonal anti-mouse CD3e (clone 145-2C11)-APC    | eBioscience              | Cat#17-0031-82<br>RRID: AB_469315 |
| Armenian hamster monoclonal anti-mouse CD3e (clone 145-2C11)-APC    | BioLegend                | Cat#100312<br>RRID: AB_312677     |
| Rat monoclonal anti-mouse CD11b (clone M1/70)-PE-Cyanine7           | eBioscience              | Cat#25-0112-82<br>RRID: AB_469588 |
| Rat monoclonal anti-mouse CD11b (clone M1/70)-Brilliant Violet 510  | BioLegend                | Cat#101263<br>RRID:<br>AB_2629529 |
| Rat monoclonal anti-mouse Gr1 (clone RB6-8C5)-PE-Cyanine7           | BioLegend                | Cat#25-5931-82<br>RRID: AB_469663 |
| Rat monoclonal anti-mouse Gr1 (clone RB6-8C5)-Brilliant Violet 421  | BD Biosciences           | Cat#562709<br>RRID:<br>AB_2737736 |
| Chemicals, Peptides, and Recombinant Proteins                       |                          |                                   |
| Recombinant murine stem cell factor                                 | PeproTech                | Cat#250-03                        |
| Recombinant murine interleukin-3                                    | PeproTech                | Cat#213-13                        |
| Recombinant murine granulocyte-macrophage colony-stimulating factor | PeproTech                | Cat#315-03                        |
| Recombinant murine interleukin-6                                    | PeproTech                | Cat#216-16                        |
| Recombinant murine interleukin-7                                    | PeproTech                | Cat#217-17                        |
| Recombinant murine Flt3-ligand                                      | PeproTech                | Cat#250-31L                       |
| RetroNectin (Recombinant human fibronectin fragment)                | Takara Bio               | Cat#T100A                         |
| Lipofectamine 2000 transfection reagent                             | Thermo Fisher            | Cat#11668027                      |
| Dynabeads M-280 streptavidin                                        | Invitrogen               | Cat#11205D                        |
| Anti-FLAG M2 magnetic beads affinity isolated antibody              | Sigma-Aldrich            | Cat#M8823                         |
| RapiGest SF                                                         | Waters                   | Cat#186001861                     |
| RNaseOUT recombinant ribonuclease inhibitor                         | Invitrogen               | Cat#10777019                      |
| Micrococcal nuclease                                                | Sigma-Aldrich            | Cat#N3755-200U                    |
| Hoechst 33342 solution                                              | Thermo Fisher Scientific | Cat#H3570                         |
| Protease inhibitor cocktail                                         | Roche                    | Cat#11873580001                   |

|                                                    |                                  |                                |
|----------------------------------------------------|----------------------------------|--------------------------------|
| Actinomycin D                                      | Wako Chemicals                   | Cat#018-21264                  |
| Cycloheximide                                      | Nacalai Tesque                   | Cat#06741-91                   |
| Critical Commercial Assays                         |                                  |                                |
| RNeasy mini kit                                    | Qiagen                           | Cat#74016                      |
| RNase-free DNase kit                               | Qiagen                           | Cat#79254                      |
| SuperScript III first-strand cDNA synthesis system | Invitrogen                       | Cat#18180051                   |
| High pure PCR template preparation kit             | Roche                            | Cat#11796828001                |
| c-Kit magnetic beads                               | Miltenyi Biotec                  | Cat#130-091-224                |
| SureSelect strand specific RNA library prep kit    | Agilent<br>Technologies          | Cat#G9691A                     |
| NextSeq 500/550 high output kit v2.5               | Illumina                         | Cat#20024906                   |
| RNA6000 pico kit                                   | Agilent<br>Technologies          | Cat#5067-1513                  |
| High sensitivity D1000 kit                         | Agilent<br>Technologies          | Cat#5067- 5585                 |
| Kapa library quantification kit                    | Kapa Biosystems                  | Cat#07960140001                |
| Gibson assembly master mix                         | New England<br>Biolabs           | Cat#E26115                     |
| NucleoSpin RNA                                     | Takara Bio                       | Cat#740955                     |
| PrimeScript RT reagent kit (Perfect real time)     | Takara Bio                       | Cat#RR037B                     |
| Thunderbird SYBR qPCR mix                          | Takara Bio                       | Cat#QPS-201                    |
| Deposited Data                                     |                                  |                                |
| Data files for RNA-seq                             | This paper                       | GSE201503                      |
| Experimental Models: Cell Lines                    |                                  |                                |
| Human: 293T cells                                  | ATCC                             | CRL-3216<br>RRID:<br>CVCL_0063 |
| Human: PLAT-E cells                                | Morita et al., 2000 <sup>1</sup> | N/A                            |
| Human: 293TN Producer cells                        | System Bioscience                | LV900A-1<br>RRID:<br>CVCL_UL49 |
| Human: CCRF-CEM cells                              | JCRB Cell Bank                   | JCRB0033<br>RRID:<br>CVCL_0207 |

|                      |                                   |                                |
|----------------------|-----------------------------------|--------------------------------|
| Human: MOLT-4 cells  | JCRB Cell Bank                    | JCRB9031<br>RRID:<br>CVCL_0013 |
| Human: CCRF-SB cells | JCRB Cell Bank                    | JCRB0032<br>RRID:<br>CVCL_1860 |
| Human: KOPN-8 cells  | DSMZ                              | ACC552<br>RRID:<br>CVCL_1866   |
| Human: HB1119 cells  | Tkachuk et al., 1992 <sup>2</sup> | RRID:<br>CVCL_8227             |
| Human: SEM cells     | DSMZ                              | ACC546<br>RRID:<br>CVCL_0095   |
| Human: RS4;11 cells  | ATCC                              | CRL-1873<br>RRID:<br>CVCL_0093 |
| Human: KG-1 cells    | JCRB Cell Bank                    | JCRB0065<br>RRID:<br>CVCL_0374 |
| Human: EOL-1 cells   | Obtained from<br>Michael Cleary   | RRID:<br>CVCL_0258             |
| Human: ML-2 cells    | DSMZ                              | ACC15<br>RRID:<br>CVCL_1418    |
| Human: NOMO-1 cells  | JCRB Cell Bank                    | IFO50474<br>RRID:<br>CVCL_1609 |
| Human: MOLM-13 cells | DSMZ                              | ACC554<br>RRID:<br>CVCL_2119   |
| Human: THP-1 cells   | ATCC                              | TIB-202<br>RRID:<br>CVCL_0006  |



|                                        |                                 |                                |
|----------------------------------------|---------------------------------|--------------------------------|
| Human: MV4-11 cells                    | ATCC                            | CRL-9591<br>RRID:<br>CVCL_0064 |
| Mouse: MS-5 cells                      | DSMZ                            | ACC441<br>RRID:<br>CVCL_2128   |
| Mouse: MS-5-neo cells                  | This paper                      | N/A                            |
| Mouse: Ba/F3 cells                     | Obtained from<br>RIKEN BRC      |                                |
| Mouse: MEF clone C2-20 cells           | Okuda et al., 2015 <sup>3</sup> |                                |
| Experimental Models: Organisms/Strains |                                 |                                |
| Mouse: C57BL/6JJe1                     | CLEA Japan                      | N/A                            |
| Oligonucleotides                       |                                 |                                |
| TaqMan Probe, mouse <i>Hoxa9</i>       | Life Technologies               | Cat#Mm00439364<br>_m1          |
| TaqMan Probe, mouse <i>Gapdh</i>       | Life Technologies               | Cat#Mm99999915<br>_g1          |
| TaqMan Probe, mouse <i>Kit</i>         | Life Technologies               | Cat#Mm00445212<br>_m1          |
| TaqMan Probe, mouse <i>Meis1</i>       | Life Technologies               | Cat#Mm00487664<br>_m1          |
| TaqMan Probe, mouse <i>Hoxa6</i>       | Life Technologies               | Cat#Mm00550244<br>_m1          |
| TaqMan Probe, mouse <i>Hoxa7</i>       | Life Technologies               | Cat#Mm00657963<br>_m1          |
| TaqMan Probe, mouse <i>Hoxa10</i>      | Life Technologies               | Cat#Mm00433966<br>_m1          |
| TaqMan Probe, mouse <i>Hoxa11</i>      | Life Technologies               | Cat#Mm00439360<br>_m1          |
| TaqMan Probe, mouse <i>Myc</i>         | Life Technologies               | Cat#Mm00487804<br>_m1          |
| TaqMan Probe, human <i>GAPDH</i>       | Life Technologies               | Cat#Hs02786624_<br>g1          |

|                                                                        |                                     |                                          |
|------------------------------------------------------------------------|-------------------------------------|------------------------------------------|
| TaqMan Probe, human <i>AF4</i>                                         | Life Technologies                   | Cat#Hs01014712_m1                        |
| Oligonucleotides for gene editing and shRNA, see Supplementary Table 2 | This paper                          | N/A                                      |
| Custom TaqMan Probes, see Supplementary Table 3                        | Life Technologies                   | N/A                                      |
| Primers for SYBR green qPCR, see Supplementary Table 4                 | This paper                          | N/A                                      |
| Biotinylated-RNA oligo, see Supplementary Figure 4C                    | Thermo Fisher Scientific            | N/A                                      |
| Recombinant DNA                                                        |                                     |                                          |
| pMDLg/pRRE                                                             | Dull et al., 1998 <sup>4</sup>      | Addgene: 12251<br>RRID:<br>Addgene_12251 |
| pRSV-Rev                                                               | Dull et al., 1998 <sup>4</sup>      | Addgene: 12253<br>RRID:<br>Addgene_12253 |
| pMD2.G                                                                 | Gift from Didier Trono              | Addgene: 12259<br>RRID:<br>Addgene_12259 |
| pMSCV-neo                                                              | Clontech Laboratories               | Cat#634401                               |
| pMSCV-neo-MLL(5')                                                      | Okuda et al., 2015 <sup>3</sup>     |                                          |
| pMSCV-neo-MLL-ENL                                                      | Yokoyama et al., 2008 <sup>5</sup>  |                                          |
| pMSCV-neo-MLL-AF10                                                     | DiMartino et al., 2002 <sup>6</sup> |                                          |
| pMSCV-neo-MLL-AF4                                                      | This paper                          | N/A                                      |
| pMSCV-neo-MLL-mAf4                                                     | This paper                          | N/A                                      |
| pMSCV-neo-MLL-AF4 m(HindIII-end)                                       | This paper                          | N/A                                      |
| pMSCV-neo-MLL-AF4 m(D4-end)                                            | This paper                          | N/A                                      |
| pMSCV-neo-MLL-AF4 m(S3-end)                                            | This paper                          | N/A                                      |
| pMSCV-neo-MLL-AF4 m(S4-end)                                            | This paper                          | N/A                                      |
| pMSCV-neo-MLL-AF4 m(S5-end)                                            | This paper                          | N/A                                      |
| pMSCV-neo-MLL-AF4 m(S0-end)                                            | This paper                          | N/A                                      |

|                                               |                    |              |
|-----------------------------------------------|--------------------|--------------|
| pMSCV-neo-MLL-AF4 m(S1-end)                   | This paper         | N/A          |
| pMSCV-neo-MLL-AF4 m(S2-end)                   | This paper         | N/A          |
| pMSCV-neo-MLL-AF4 m(EcoRI-end)                | This paper         | N/A          |
| pMSCV-neo-MLL-AF4 mPTRS                       | This paper         | N/A          |
| pMSCV-neo-MLL-AF4 sPTRS                       | This paper         | N/A          |
| pMSCV-neo-MLL-AF4 s(S5-S8)                    | This paper         | N/A          |
| pMSCV-neo-MLL-AF4 s(S8-S7)                    | This paper         | N/A          |
| pMSCV-neo-MLL-AF4 s(S7-S1)                    | This paper         | N/A          |
| pMSCV-neo-MLL-AF4 sAU1                        | This paper         | N/A          |
| pMSCV-neo-MLL-AF4 sAU2                        | This paper         | N/A          |
| pMSCV-neo-MLL-AF4 sAU3                        | This paper         | N/A          |
| pMSCV-neo-MLL-AF4 sAU12                       | This paper         | N/A          |
| pMSCV-neo-MLL-AF4 sAU13                       | This paper         | N/A          |
| pMSCV-neo-MLL-AF4 sAU23                       | This paper         | N/A          |
| pMSCV-neo-MLL-AF4 sAU123                      | This paper         | N/A          |
| pMSCV-neo-MLL-mAf4 h(HindIII-end)             | This paper         | N/A          |
| pMSCV-neo-MLL-mAf4 h(D4-end)                  | This paper         | N/A          |
| pMSCV-neo-MLL-mAf4 h(S3-end)                  | This paper         | N/A          |
| pMSCV-neo-MLL-mAf4 h(S4-end)                  | This paper         | N/A          |
| pMSCV-neo-MLL-mAf4 h(S5-end)                  | This paper         | N/A          |
| pMSCV-neo-MLL-mAf4 h(S0-end)                  | This paper         | N/A          |
| pMSCV-neo-MLL-mAf4 h(S1-end)                  | This paper         | N/A          |
| pMSCV-neo-MLL-mAf4 h(S2-end)                  | This paper         | N/A          |
| pMSCV-neo-MLL-mAf4 h(EcoRI-end)               | This paper         | N/A          |
| pMSCV-neo-MLL-mAf4 hPTRS                      | This paper         | N/A          |
| pMSCV-neo-MLL-mAf4 hAU123                     | This paper         | N/A          |
| pMSCV-hygro-AF4-MLL                           | This paper         | N/A          |
| pMSCV-hygro-AF4-MLL $\Delta$ C                | This paper         | N/A          |
| pCDH-MSCV-MCS-EF1-Puro                        | System Biosciences | Cat#CD710B-1 |
| pCDH-MSCV-MCS-EF1-Hygro                       | This Paper         | N/A          |
| pCDH-MSCV-RFP-HA-P2A-FLAG-GFP-EF1-Hygro       | This Paper         | N/A          |
| pCDH-MSCV-RFP-HA-P2A-FLAG-GFP-hPTRS-EF1-Hygro | This Paper         | N/A          |

|                                                      |                    |              |
|------------------------------------------------------|--------------------|--------------|
| pCDH-MSCV-RFP-HA-P2A-FLAG-GFP-mPTRS-EF1-Hygro        | This Paper         | N/A          |
| pCDH-MSCV-RFP-HA-P2A-FLAG-GFP-sPTRS-EF1-Hygro        | This Paper         | N/A          |
| pCDH-MSCV-RFP-HA-P2A-FLAG-GFP-hPTRS-sAU1-EF1-Hygro   | This Paper         | N/A          |
| pCDH-MSCV-RFP-HA-P2A-FLAG-GFP-hPTRS-sAU2-EF1-Hygro   | This Paper         | N/A          |
| pCDH-MSCV-RFP-HA-P2A-FLAG-GFP-hPTRS-sAU3-EF1-Hygro   | This Paper         | N/A          |
| pCDH-MSCV-RFP-HA-P2A-FLAG-GFP-hPTRS-sAU12-EF1-Hygro  | This Paper         | N/A          |
| pCDH-MSCV-RFP-HA-P2A-FLAG-GFP-hPTRS-sAU13-EF1-Hygro  | This Paper         | N/A          |
| pCDH-MSCV-RFP-HA-P2A-FLAG-GFP-hPTRS-sAU23-EF1-Hygro  | This Paper         | N/A          |
| pCDH-MSCV-RFP-HA-P2A-FLAG-GFP-hPTRS-sAU123-EF1-Hygro | This Paper         | N/A          |
| pCDH-MSCV-RFP-HA-P2A-FLAG-GFP-STOP-hPTRS-EF1-Hygro   | This Paper         | N/A          |
| pCDH-MSCV-RFP-HA-P2A-FLAG-GFP-mPTRS-hAU123-EF1-Hygro | This Paper         | N/A          |
| pCDH-MSCV-RFP-HA-P2A-FLAG-GFP-Rx12-EF1-Hygro         | This Paper         | N/A          |
| pCDH-MSCV-FLAG-GFP-EF1-Hygro                         | This Paper         | N/A          |
| pCDH-MSCV-mCherry-KHDRBS1-EF1-Puro                   | This Paper         | N/A          |
| pCDH-MSCV-mCherry-KHDRBS3-EF1-Puro                   | This Paper         | N/A          |
| pCDH-MSCV-mCherry-IGF2BP1-EF1-Puro                   | This Paper         | N/A          |
| pCDH-MSCV-mCherry-IGF2BP2-EF1-Puro                   | This Paper         | N/A          |
| pCDH-MSCV-mCherry-IGF2BP3-EF1-Puro                   | This Paper         | N/A          |
| pCDH-MSCV-mCherry-HNRNPAB-EF1-Puro                   | This Paper         | N/A          |
| pCDH-MSCV-MCS-EF1-copGFP                             | System Biosciences | Cat#CD711B-1 |
| pCDH-MSCV-IGF2BP3-EF1-copGFP                         | This Paper         | N/A          |
| pCMV5-FLAG-KHDRBS1                                   | This Paper         | N/A          |

|                                         |                                    |                                                                                                                       |
|-----------------------------------------|------------------------------------|-----------------------------------------------------------------------------------------------------------------------|
| pCMV5-FLAG-KHDRBS3                      | This Paper                         | N/A                                                                                                                   |
| pCMV5-FLAG-IGF2BP1                      | This Paper                         | N/A                                                                                                                   |
| pCMV5-FLAG-IGF2BP2                      | This Paper                         | N/A                                                                                                                   |
| pCMV5-FLAG-IGF2BP3                      | This Paper                         | N/A                                                                                                                   |
| pCMV5-FLAG-ELAVL1                       | This Paper                         | N/A                                                                                                                   |
| pCMV5-FLAG-HNRNPA0                      | This Paper                         | N/A                                                                                                                   |
| pCMV5-FLAG-HNRNPAB                      | This Paper                         | N/A                                                                                                                   |
| pCMV5-FLAG-HNRNPC                       | This Paper                         | N/A                                                                                                                   |
| pCMV5-FLAG-HNRNPD                       | This Paper                         | N/A                                                                                                                   |
| pCMV5-FLAG-HNRNPDL                      | This Paper                         | N/A                                                                                                                   |
| pCMV5-FLAG-HNRNPL                       | This Paper                         | N/A                                                                                                                   |
| pCMV5-FLAG-HNRNPR                       | This Paper                         | N/A                                                                                                                   |
| pCMV5-FLAG-SYNCRIP                      | This Paper                         | N/A                                                                                                                   |
| pKLV2-EF1a-Cas9Bsd-W                    | Tzelepis et al., 2016 <sup>7</sup> | Addgene: 68343<br>RRID:<br>Addgene_68343                                                                              |
| pKLV2-U6gRNA5(BbsI)-PGKpuro2ABFP-W      | Tzelepis et al., 2016 <sup>7</sup> | Addgene: 67974<br>RRID:<br>Addgene_67974                                                                              |
| pX330-U6-Chimeric_BB-CBh-hSpCas9        | Cong et al., 2013 <sup>8</sup>     | Addgene: 42230<br>RRID:<br>Addgene_42230                                                                              |
| pX335-U6-Chimeric_BB-CBh-hSpCas9n(D10A) | Cong et al., 2013 <sup>8</sup>     | Addgene: 42235<br>RRID:<br>Addgene_42335                                                                              |
| Software and Algorithms                 |                                    |                                                                                                                       |
| GraphPad Prism 9.3.1                    | GraphPad Software                  | <a href="https://www.graphpad.com/scientific-software/prism/">https://www.graphpad.com/scientific-software/prism/</a> |
| Xcalibur                                | Thermo Fisher Scientific           | Cat#OPTON-30965                                                                                                       |
| CHOPCHOP                                | Labun et al., 2019 <sup>9</sup>    | <a href="http://chopchop.cb.u.uib.no/">http://chopchop.cb.u.uib.no/</a>                                               |

|                                   |                                      |                                                                                                                                                                                     |
|-----------------------------------|--------------------------------------|-------------------------------------------------------------------------------------------------------------------------------------------------------------------------------------|
| CISBP-RNA                         | Ray et al., 2013 <sup>10</sup>       | <a href="http://cisbp-rna.cabr.utoronto.ca/index.php">http://cisbp-rna.cabr.utoronto.ca/index.php</a>                                                                               |
| miRBase                           | Kozomara et al., 2019 <sup>11</sup>  | <a href="https://mirbase.org/">https://mirbase.org/</a>                                                                                                                             |
| lncRNADB                          | Amaral et al., 2011 <sup>12</sup>    | <a href="http://lncrnadb.org/">http://lncrnadb.org/</a>                                                                                                                             |
| ImageJ                            | Schneider et al., 2012 <sup>13</sup> | <a href="https://imagej.nih.gov/ij/">https://imagej.nih.gov/ij/</a>                                                                                                                 |
| FlowJo v10.8.1                    | BD Biosciences                       | <a href="https://www.flowjo.com/">https://www.flowjo.com/</a>                                                                                                                       |
| Bcl2fastq ver.2.20.0              | Illumina                             | <a href="https://jp.support.illumina.com/downloads/bcl2fastq-conversion-software-v2-20.html">https://jp.support.illumina.com/downloads/bcl2fastq-conversion-software-v2-20.html</a> |
| Star ver.2.7.7a                   | Dobin et al., 2013 <sup>14</sup>     | <a href="https://github.com/alexdobin/STAR/">https://github.com/alexdobin/STAR/</a>                                                                                                 |
| Rsem ver.1.3.3                    | Li and Dewey, 2011 <sup>15</sup>     | <a href="https://github.com/deweylab/RSEM">https://github.com/deweylab/RSEM</a>                                                                                                     |
| R ver.4.1.2                       | R Core Team                          | <a href="https://www.r-project.org/">https://www.r-project.org/</a>                                                                                                                 |
| R studio ver.2021.09.1            | RStudio Team                         | <a href="https://www.rstudio.com/">https://www.rstudio.com/</a>                                                                                                                     |
| edgeR ver.3.34.1                  | Robinson et al. 2010 <sup>16</sup>   | <a href="https://bioconductor.org/packages/edgeR/">https://bioconductor.org/packages/edgeR/</a>                                                                                     |
| Seurat ver.4.1.0                  | Satija Lab <sup>17</sup>             | <a href="https://satijalab.org/seurat">https://satijalab.org/seurat</a>                                                                                                             |
| Source of Public Data Analysis    |                                      |                                                                                                                                                                                     |
| Murine fetal HSPCs scRNA-seq data | Li et al., 2020 <sup>18</sup>        | GSE128761                                                                                                                                                                           |
| Human leukemia microarray data    | MILE stage 2 <sup>19</sup>           | GSE13164                                                                                                                                                                            |

**Supplementary Table 2. Oligonucleotides for gene editing and shRNA-mediated knockdown.**

| Target name | Target sequence       |
|-------------|-----------------------|
| sgKhdrbs1#1 | GAACCCACCACCGTCGCGTC  |
| sgKhdrbs1#2 | CGGGTCGAGCGAGTCCTTCT  |
| sgKhdrbs3#1 | AACGGCCGCCGAGCTCACCT  |
| sgKhdrbs3#2 | CGCTTCAGGGAATTGCCACG  |
| sgIgf2bp1#1 | TCATCGCCCAGTGCTCGTCG  |
| sgIgf2bp1#2 | ATAGCGCCTACATACTGCGT  |
| sgIgf2bp2#1 | CGCGCCATCGAGACCCTCTC  |
| sgIgf2bp2#2 | AGGTCGTCGGCGGTGACGGC  |
| sgIgf2bp3#1 | ACGCGTAGCCCGTCTTCACC  |
| sgIgf2bp3#2 | CTACGCGTTCGTGGACTGCC  |
| sgElav1#1   | CTTATTCGGGATAAAGTAGC  |
| sgElav1#2   | CGAAGTCTGTTCAGCAGCAT  |
| sgHnrnpa0#1 | TGTCGCGGGAGGATTCGGCG  |
| sgHnrnpa0#2 | TACGGGCCGATGAAGAGCGG  |
| sgHnrnpab#1 | GGCCTCGTGTCCGTTCTCGG  |
| sgHnrnpab#2 | GGACCACGACCGCACCGAGC  |
| sgHnrnpc#1  | ACACGGGAATTCATGGACCG  |
| sgHnrnpc#2  | GGACCGAGGATCTGTCTTGT  |
| sgHnrnpd#1  | GTCGGAGGAGCAGTTCGGAG  |
| sgHnrnpd#2  | GTTCTTACTGGCGTCGATCT  |
| sgHnrnpdl#1 | TAGCCGCCCCGCCCCCAAT   |
| sgHnrnpdl#2 | GGAACAATGGCGGCGGCACA  |
| sgHnrnpl#1  | CTATTACGGCGGCGGCAACG  |
| sgHnrnpl#2  | GGCGGTGGTCGCTATTACGG  |
| sgHnrnpr#1  | TGCTTCATCGGGCCCTTTCG  |
| sgHnrnpr#2  | GCCCGATGAAGCAAAAATCA  |
| sgSyncrip#1 | TTTACTAGAGTCTGCTACTT  |
| sgSyncrip#2 | AAAGTAGCAGACTCTAGTAA  |
| shIGF2BP3#1 | TCTGCGGCTTGTAAGTCTATT |
| shIGF2BP3#2 | TGTTGTAGTCTCACAGTATAA |

**Supplementary Table 3. Sequences of the custom TaqMan Probes.**

| Primer/probe name         | Sequence                   |
|---------------------------|----------------------------|
| MSCV-EPS-Forward          | TTGTCTCTGTCTGACTGTGTTTCTG  |
| MSCV-EPS-Probe            | CTGGCCCTAATTTTCA           |
| MSCV-EPS-Reverse          | GGTCAAACCTTAAGGGAGTGGTAACA |
| Human MLL-Forward         | CCAAGTTTGGTGGTCGCAATATAAA  |
| Human MLL-Probe           | CAGTGCTGCAAGATGAG          |
| Human MLL-Reverse         | CATCCATTGTAGATTCTGACATTTT  |
| Mouse Gapdh locus-Forward | CCTCCTCCAATTCAACCCTTAAGAG  |
| Mouse Gapdh locus-Probe   | ATGCTGCCCTTACCCC           |
| Mouse Gapdh locus-Reverse | TCTCCTGAGTTTACCTGATGAACCT  |

**Supplementary Table 4. Sequences of the primers for SYBR green qPCR.**

| Primer name           | Sequence                 |
|-----------------------|--------------------------|
| GAPDH-Forward         | GAAATCCCATCACCATCTTCCAGG |
| GAPDH-Reverse         | GAGCCCCAGCCTTCTCCATG     |
| PTRS-Reporter-Forward | AAGCTGTACATGGAGGGCACC    |
| PTRS-Reporter-Reverse | ATCACAGGGCCGTTGGATGG     |
| Hygro-Forward         | CTGATGCTTTGGGCCGAGGA     |
| Hygro-Reverse         | CGGAGCATATACGCCCGGAG     |
| MYC -Forward          | TAGTGGAAAACCAGCAGCCT     |
| MYC -Reverse          | TTCTCCTCCTCGTCGCAGTA     |

**Supplemental references**

1. Morita, S., Kojima, T. & Kitamura, T. Plat-E: an efficient and stable system for transient packaging of retroviruses. *Gene Ther* **7**, 1063-1066 (2000).
2. Tkachuk, D.C., Kohler, S. & Cleary, M.L. Involvement of a homolog of *Drosophila trithorax* by 11q23 chromosomal translocations in acute leukemias. *Cell* **71**, 691-700 (1992).
3. Okuda, H., Kanai, A., Ito, S., Matsui, H. & Yokoyama, A. AF4 uses the SL1 components of RNAP1 machinery to initiate MLL fusion- and AEP-dependent transcription. *Nat Commun* **6**,



8869 (2015).

4. Dull, T. *et al.* A third-generation lentivirus vector with a conditional packaging system. *J Virol* **72**, 8463-8471 (1998).
5. Yokoyama, A. & Cleary, M.L. Menin critically links MLL proteins with LEDGF on cancer-associated target genes. *Cancer cell* **14**, 36-46 (2008).
6. DiMartino, J.F. *et al.* The AF10 leucine zipper is required for leukemic transformation of myeloid progenitors by MLL-AF10. *Blood* **99**, 3780-3785 (2002).
7. Tzelepis, K. *et al.* A CRISPR Dropout Screen Identifies Genetic Vulnerabilities and Therapeutic Targets in Acute Myeloid Leukemia. *Cell Rep* **17**, 1193-1205 (2016).
8. Cong, L. *et al.* Multiplex genome engineering using CRISPR/Cas systems. *Science* **339**, 819-823 (2013).
9. Labun, K. *et al.* CHOPCHOP v3: expanding the CRISPR web toolbox beyond genome editing. *Nucleic Acids Res* **47**, W171-W174 (2019).
10. Ray, D. *et al.* A compendium of RNA-binding motifs for decoding gene regulation. *Nature* **499**, 172-177 (2013).
11. Kozomara, A., Birgaoanu, M. & Griffiths-Jones, S. miRBase: from microRNA sequences to function. *Nucleic Acids Res* **47**, D155-D162 (2019).
12. Amaral, P.P., Clark, M.B., Gascoigne, D.K., Dinger, M.E. & Mattick, J.S. lncRNADB: a reference database for long noncoding RNAs. *Nucleic Acids Res* **39**, D146-151 (2011).
13. Schneider, C.A., Rasband, W.S. & Eliceiri, K.W. NIH Image to ImageJ: 25 years of image analysis. *Nat Methods* **9**, 671-675 (2012).
14. Dobin, A. *et al.* STAR: ultrafast universal RNA-seq aligner. *Bioinformatics* **29**, 15-21 (2013).
15. Li, B. & Dewey, C.N. RSEM: accurate transcript quantification from RNA-Seq data with or

without a reference genome. *BMC Bioinformatics* **12**, 323 (2011).

16. Robinson, M.D., McCarthy, D.J. & Smyth, G.K. edgeR: a Bioconductor package for differential expression analysis of digital gene expression data. *Bioinformatics* **26**, 139-140 (2010).
17. Hao, Y. *et al.* Integrated analysis of multimodal single-cell data. *Cell* **184**, 3573-3587 e3529 (2021).
18. Li, Y. *et al.* Single-Cell Analysis of Neonatal HSC Ontogeny Reveals Gradual and Uncoordinated Transcriptional Reprogramming that Begins before Birth. *Cell Stem Cell* **27**, 732-747 e737 (2020).
19. Haferlach, T. *et al.* Clinical utility of microarray-based gene expression profiling in the diagnosis and subclassification of leukemia: report from the International Microarray Innovations in Leukemia Study Group. *J Clin Oncol* **28**, 2529-2537 (2010).

## Gating strategy of FACS analysis in this study

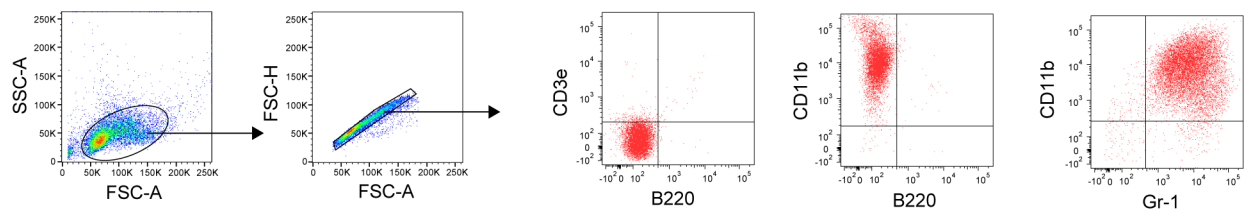

# Uncropped scans of western blotting data in this supplementary information

## Supplementary Figure 1c

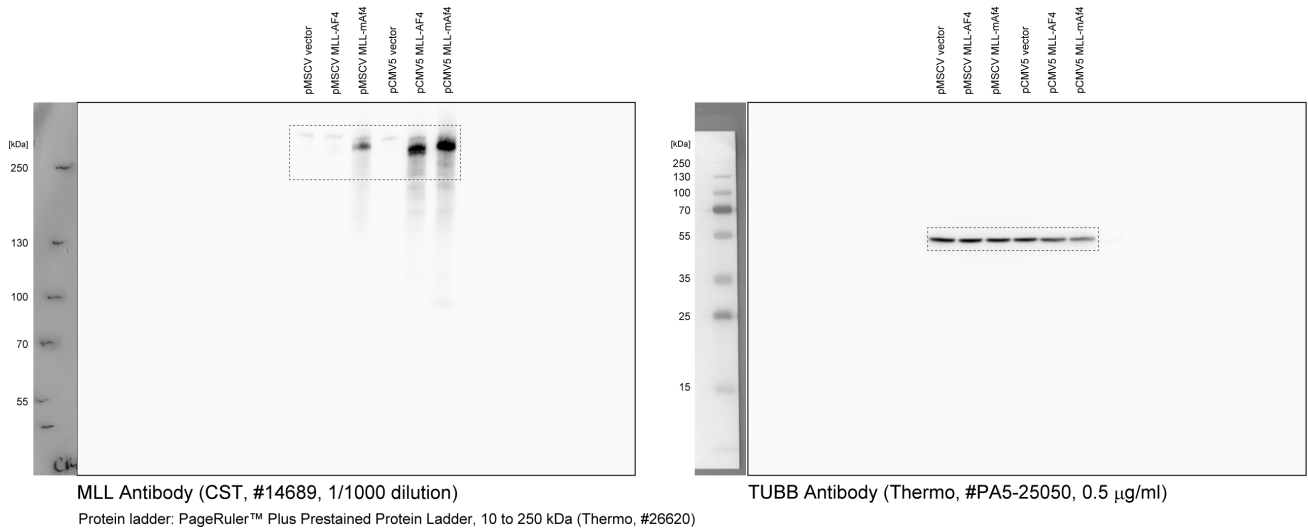

## Supplementary Figure 2b

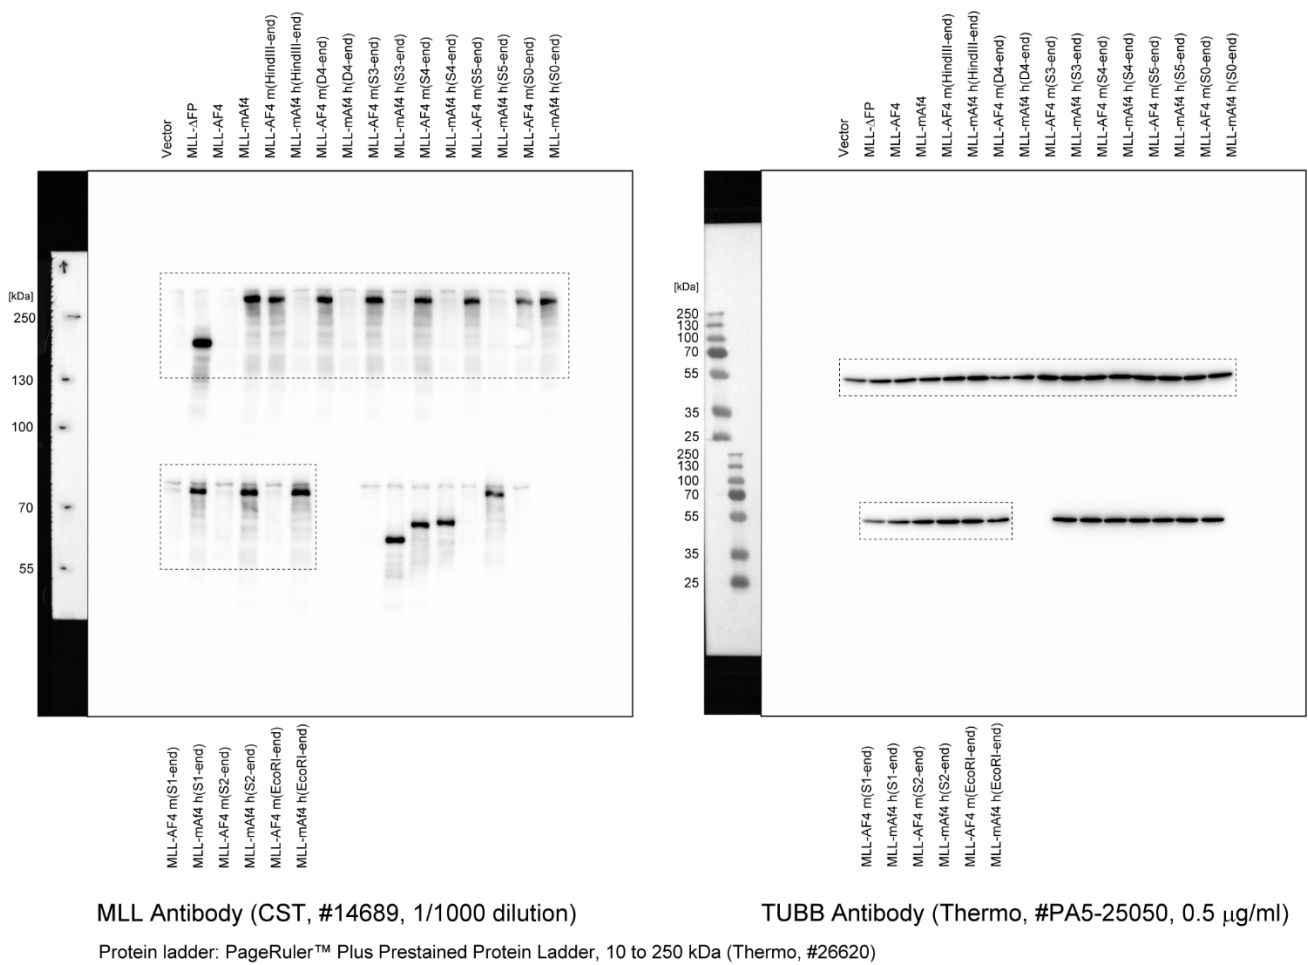

## Supplementary Figure 2f

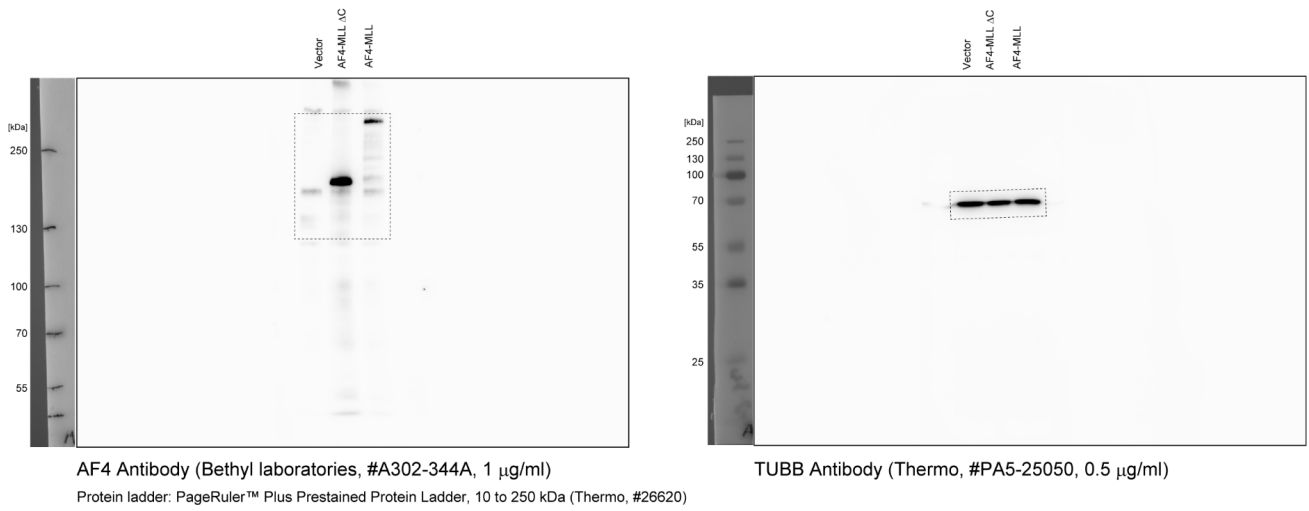

Supplementary Figure 4a

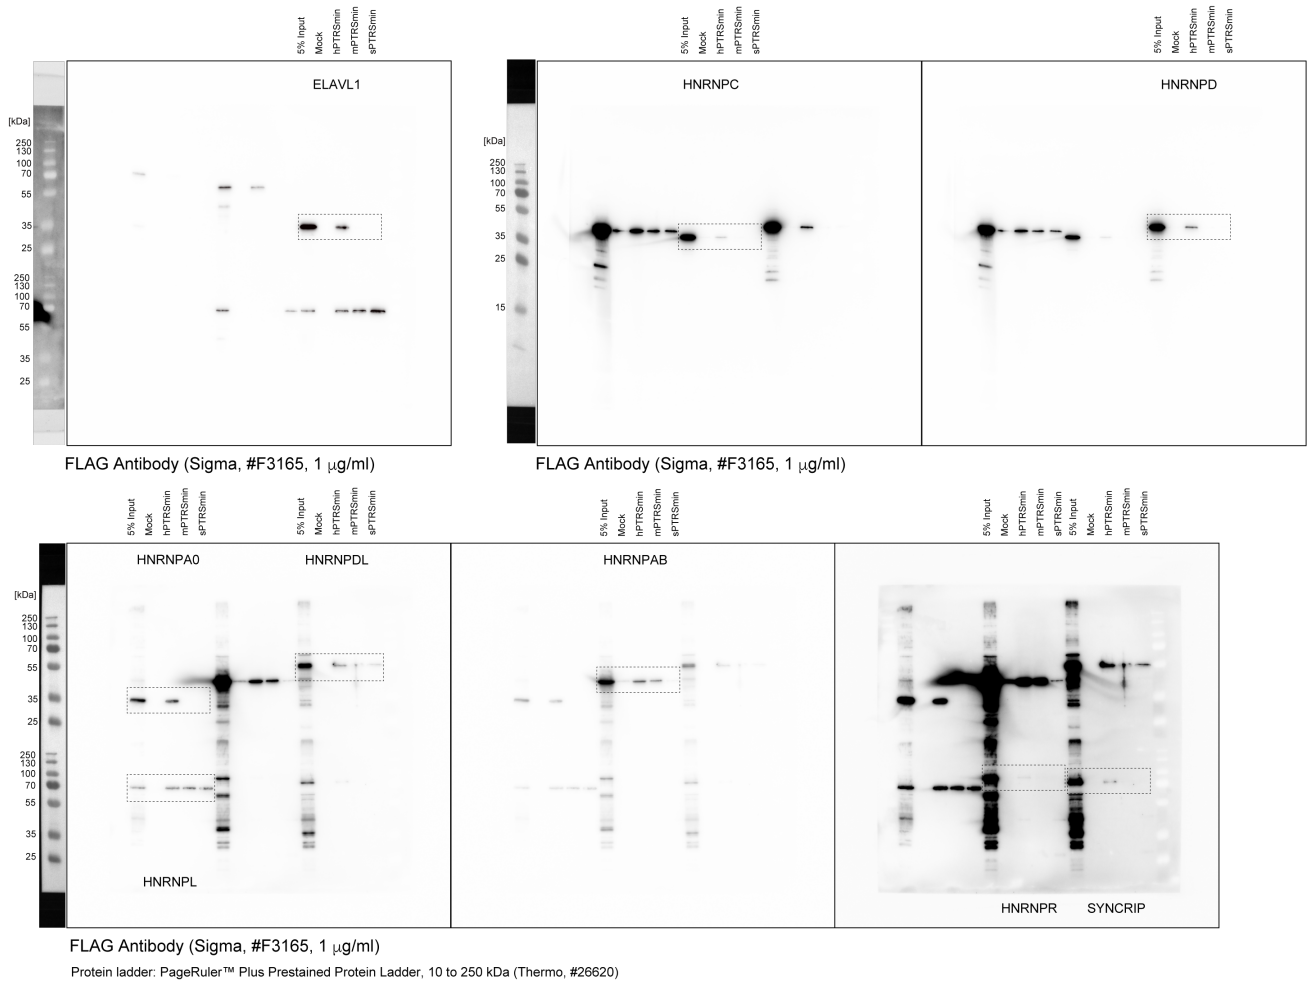

Supplementary Figure 4e

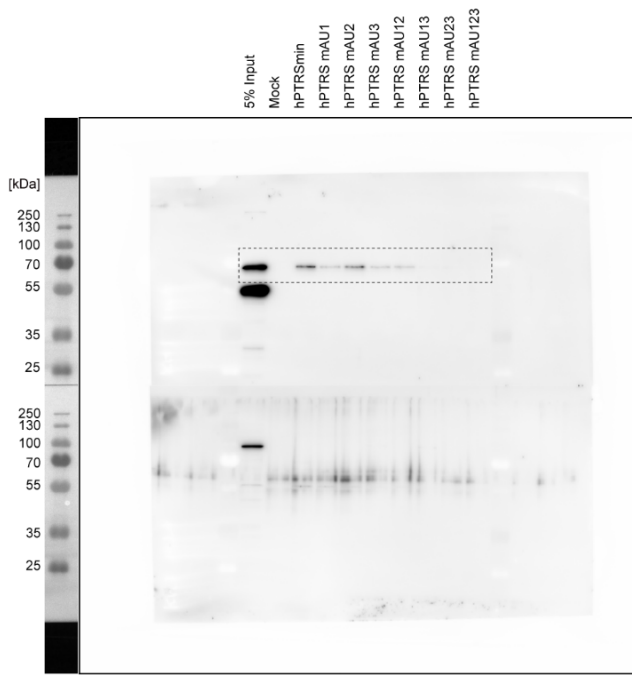

Upper : KHDRBS1 Antibody  
(Bethyl laboratories, #A302-110A, 1  $\mu$ g/ml)

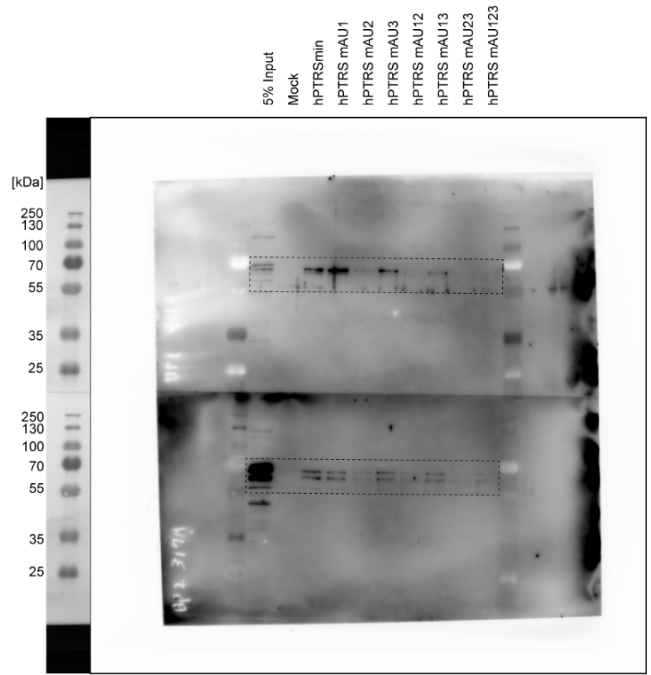

Upper : IGF2BP1 Antibody  
(Bethyl laboratories, #A303-424A, 1  $\mu$ g/ml)  
Lower : IGF2BP2 Antibody  
(Bethyl laboratories, #A303-317A, 1  $\mu$ g/ml)

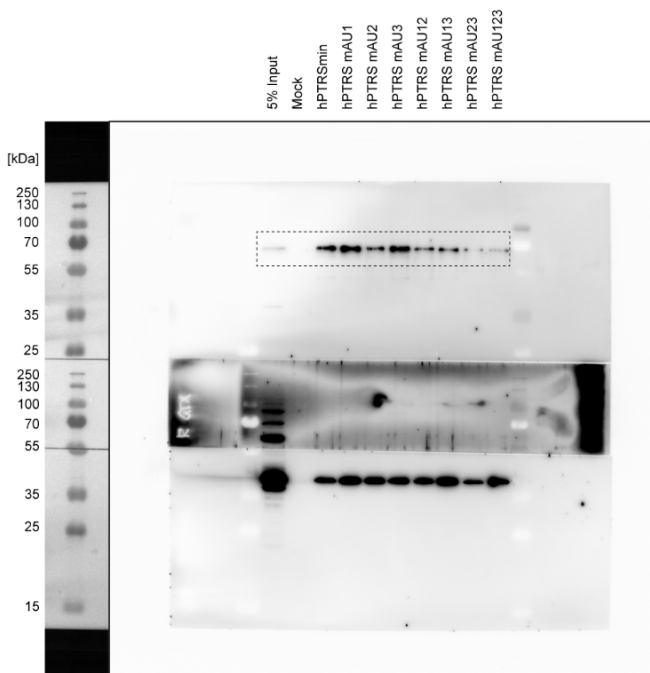

Top : IGF2BP3 Antibody  
(Bethyl laboratories, #A303-426A, 1  $\mu$ g/ml)

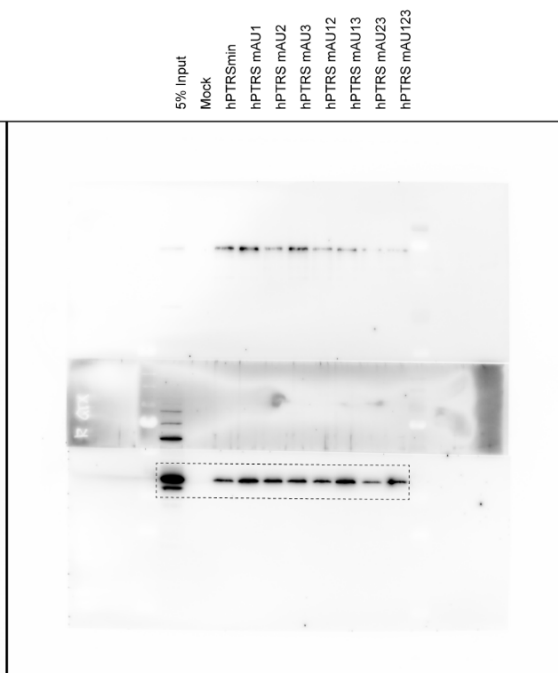

Bottom : HNRNPAB Antibody  
(SantaCruz, #sc-376411, 1  $\mu$ g/ml)

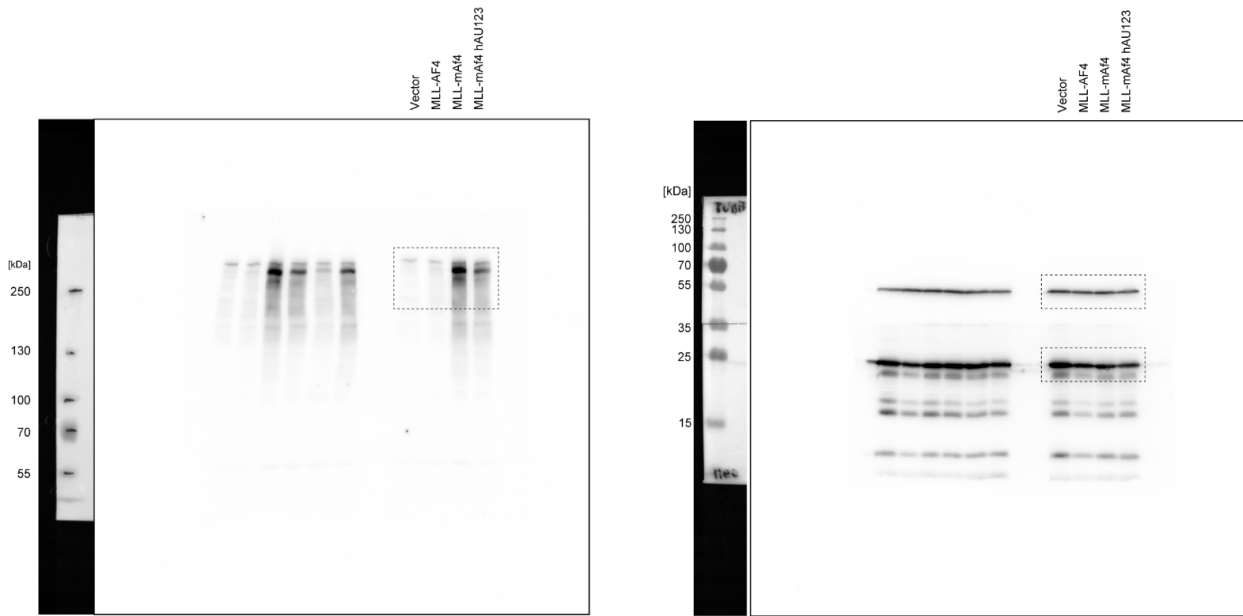

MLL Antibody (CST, #14689, 1/1000 dilution)

Upper : TUBB Antibody (Thermo, #PA5-25050, 0.5 µg/ml)

Lower : NPTII Antibody (Millipore, #06-747, 1 µg/ml)

Protein ladder: PageRuler™ Plus Prestained Protein Ladder, 10 to 250 kDa (Thermo, #26620)

### Supplementary Figure 4i

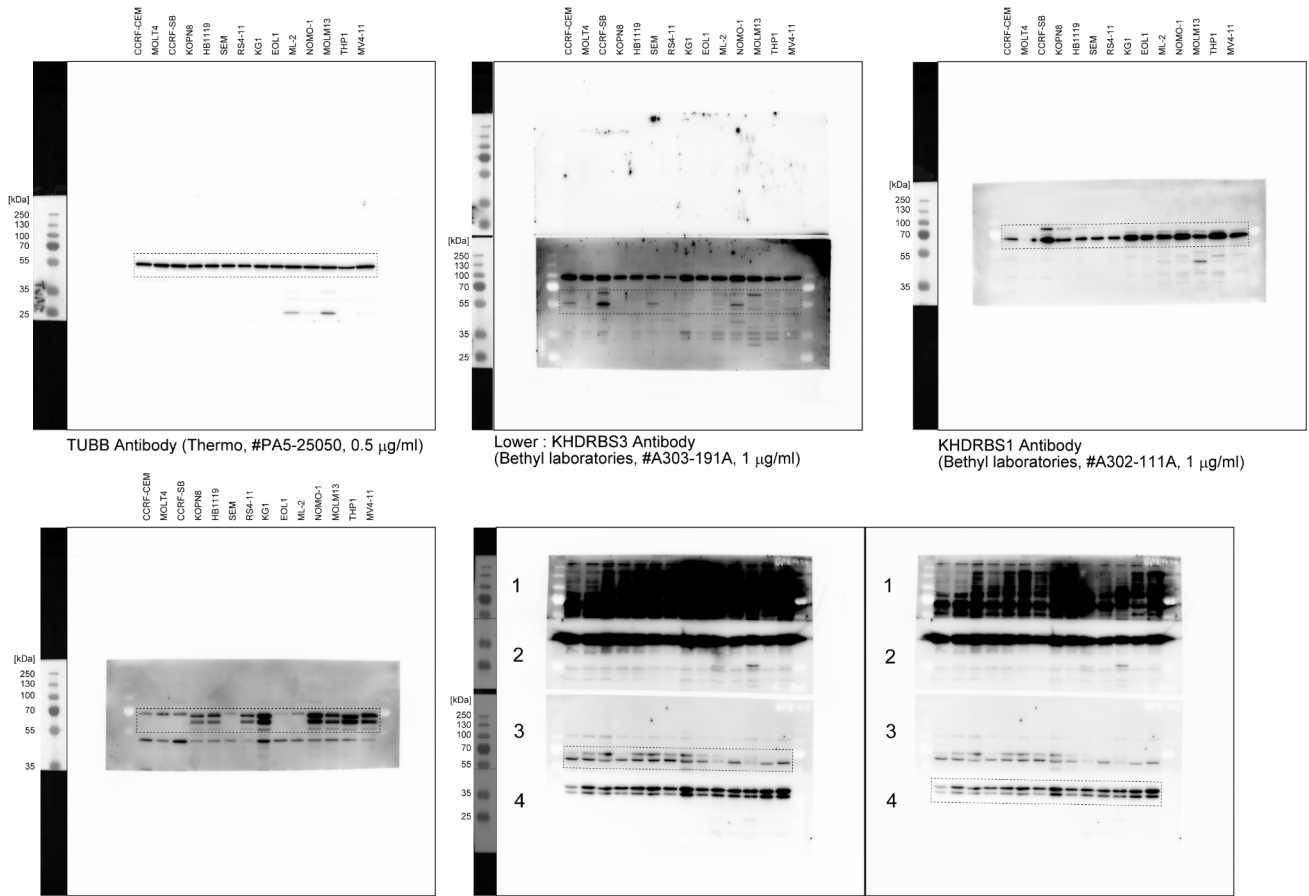

TUBB Antibody (Thermo, #PA5-25050, 0.5 µg/ml)

Lower : KHDRBS3 Antibody (Bethyl laboratories, #A303-191A, 1 µg/ml)

KHDRBS1 Antibody (Bethyl laboratories, #A302-111A, 1 µg/ml)

IGF2BP2 Antibody (Bethyl laboratories, #A303-317A, 1 µg/ml)

Third low : IGF2BP3 Antibody (Bethyl laboratories, #A303-425A, 1 µg/ml)

Fourth low : IGF2BP3 Antibody (Bethyl laboratories, #A303-425A, 1 µg/ml)

Protein ladder: PageRuler™ Plus Prestained Protein Ladder, 10 to 250 kDa (Thermo, #26620)

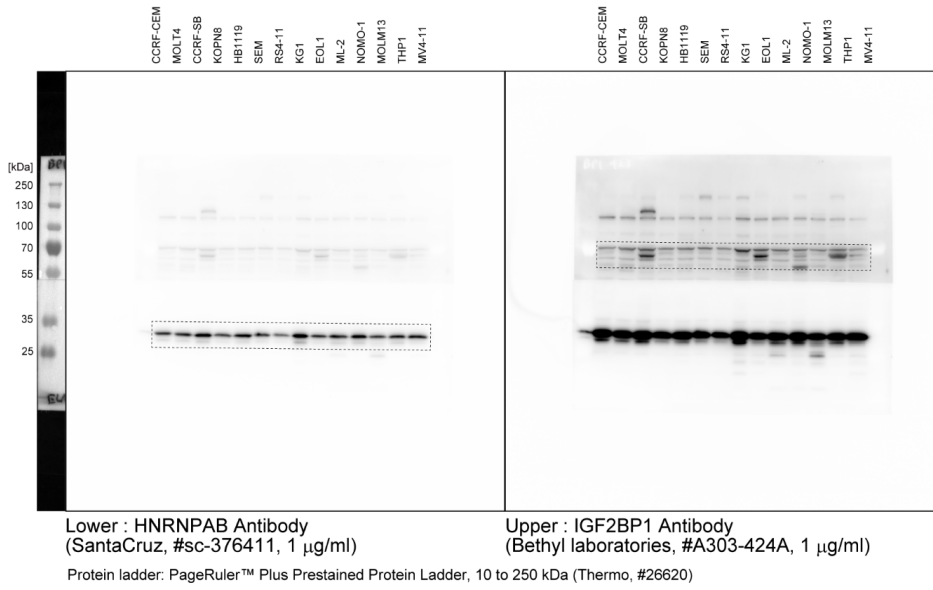

Supplementary Figure 5c

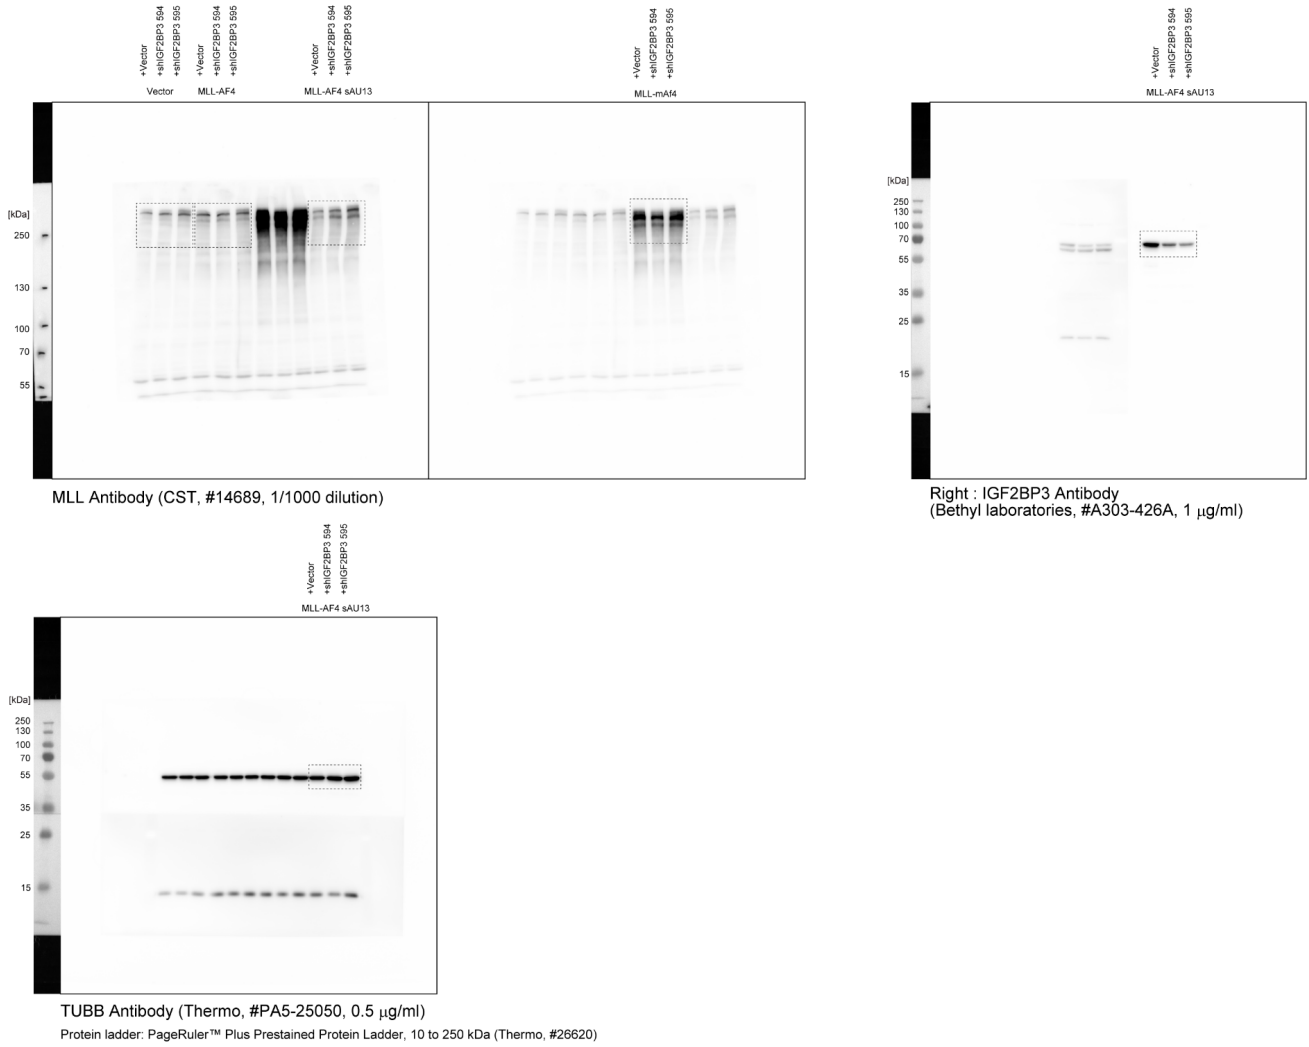

Supplementary Figure 6a



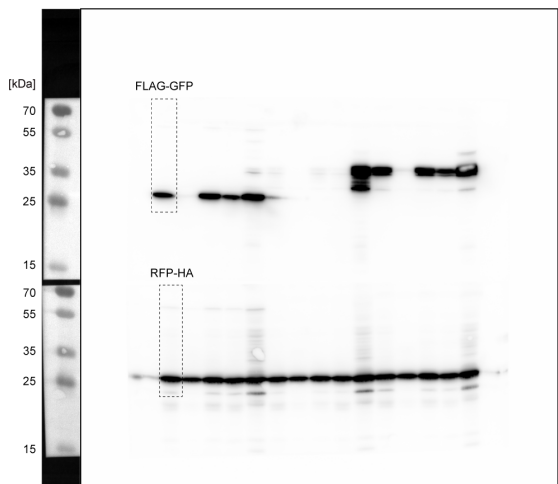

Upper : FLAG Antibody (Sigma, #F3165, 1  $\mu\text{g/ml}$ )  
 Lower : HA Antibody (Roche, #11867423001, 1  $\mu\text{g/ml}$ )

Protein ladder: PageRuler™ Plus Prestained Protein Ladder, 10 to 250 kDa (Thermo, #26620)

### Supplementary Figure 6c

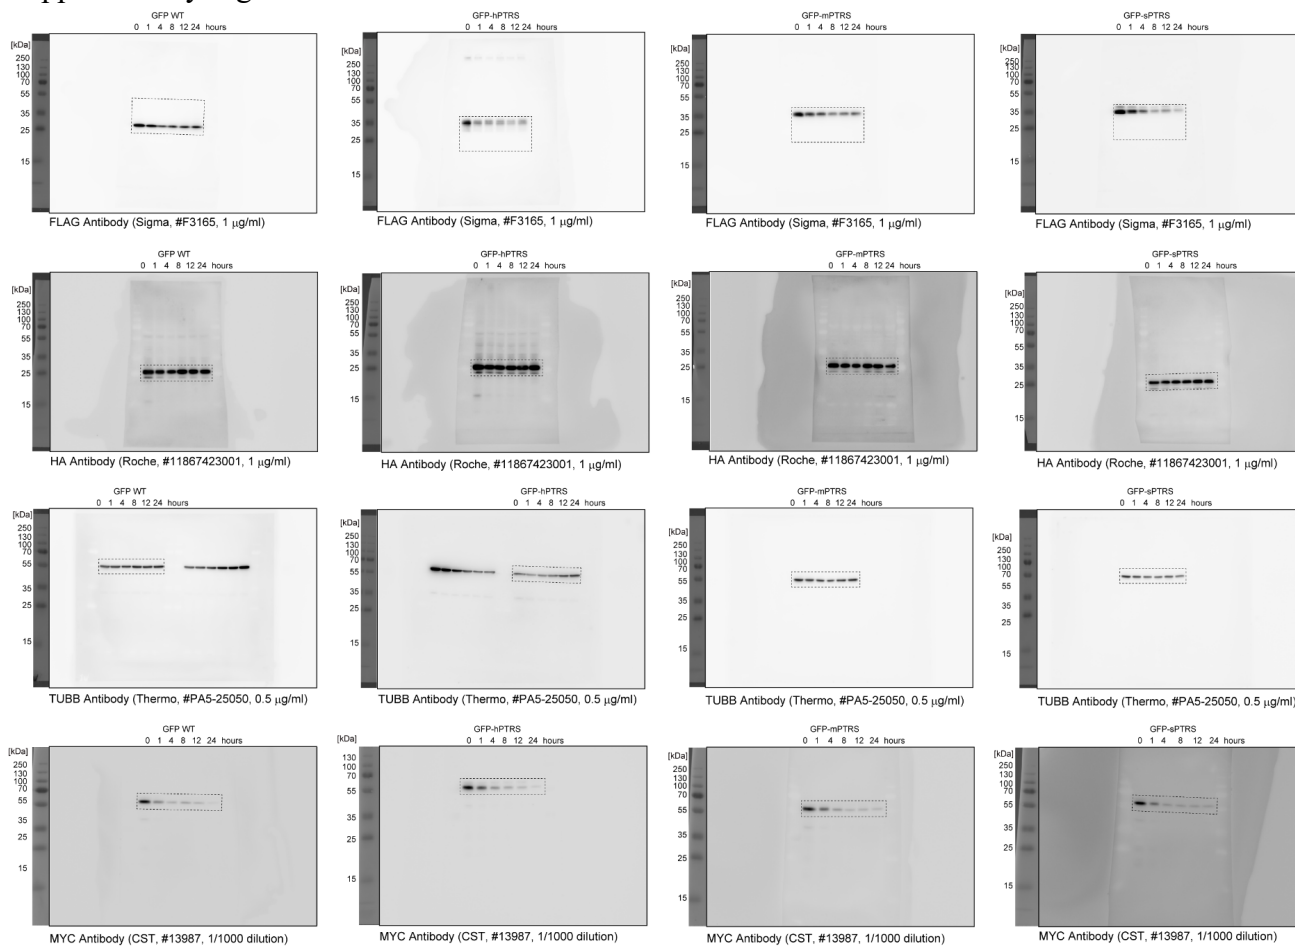

Protein ladder: PageRuler™ Plus Prestained Protein Ladder, 10 to 250 kDa (Thermo, #26620)

### Supplementary Figure 6e

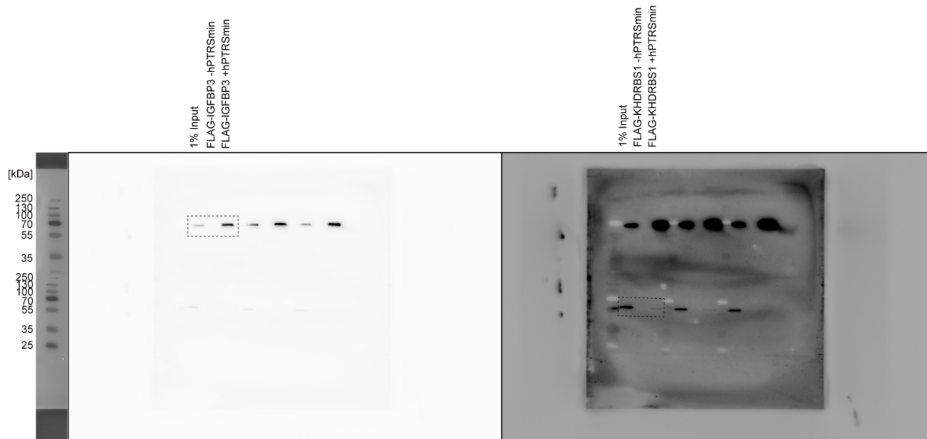

FALG Antibody (Sigma, #F3165, 1  $\mu$ g/ml)

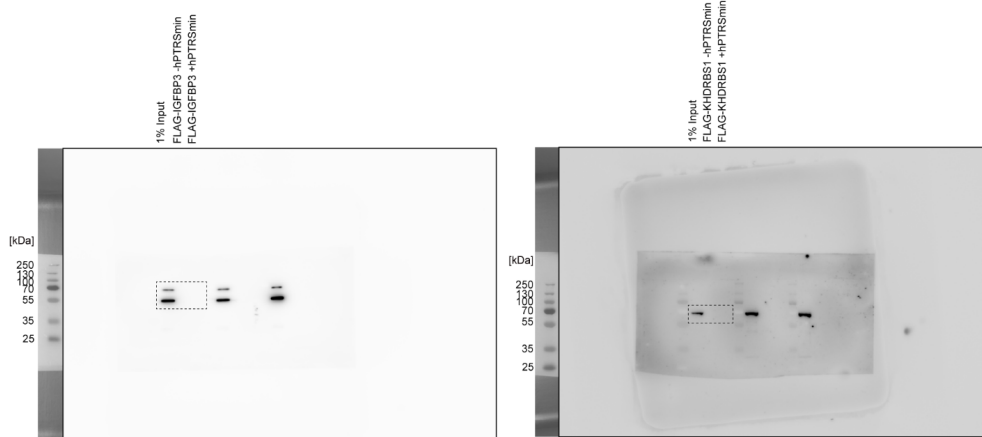

KHDRBS1 Antibody  
(Bethyl laboratories, #A302-110A, 1  $\mu$ g/ml)

IGF2BP3 Antibody  
(Bethyl laboratories, #A303-426A, 1  $\mu$ g/ml)

Protein ladder: PageRuler™ Plus Prestained Protein Ladder, 10 to 250 kDa (Thermo, #26620)
